# Supplementary material for: A systematic review with meta-analysis of comprehensive interventions for preschool children with autism spectrum disorder (ASD): study protocol
Source: PubMed Central journal article supplement — BMJ Open. 2012 Mar 6;2(2):e000679. doi: 10.1136/bmjopen-2011-000679 (PMC3298837; doi:10.1136/bmjopen-2011-000679), 2012-03-06
Supplement: bmjopen-2011-000679.draft_revisions.pdf [file bmjopen-2011-000679.draft_revisions.pdf]

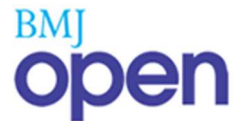

**A systematic review with meta-analysis of different models of intervention for pre-school autism: study protocol**

|                                 |                                                                                                                                                                                                                                                                                                                                                                                                                                                                                                                                                                                                                                                      |
|---------------------------------|------------------------------------------------------------------------------------------------------------------------------------------------------------------------------------------------------------------------------------------------------------------------------------------------------------------------------------------------------------------------------------------------------------------------------------------------------------------------------------------------------------------------------------------------------------------------------------------------------------------------------------------------------|
| Journal:                        | <i>BMJ Open</i>                                                                                                                                                                                                                                                                                                                                                                                                                                                                                                                                                                                                                                      |
| Manuscript ID:                  | bmjopen-2011-000679                                                                                                                                                                                                                                                                                                                                                                                                                                                                                                                                                                                                                                  |
| Article Type:                   | Protocol                                                                                                                                                                                                                                                                                                                                                                                                                                                                                                                                                                                                                                             |
| Date Submitted by the Author:   | 24-Nov-2011                                                                                                                                                                                                                                                                                                                                                                                                                                                                                                                                                                                                                                          |
| Complete List of Authors:       | Tachibana, Yoshiyuki; University of Manchester and Manchester Academic Health Sciences Centre, Department of Child and Adolescent Psychiatry; Smart Aging International Research Center, IDAC, Tohoku University, Department of Applied Brain Science<br>Green, Jonathan; University of Manchester and Manchester Academic Health Sciences Centre, Department of Child and Adolescent Psychiatry<br>Hwang, Yeonhee; Special Support Education Research Center, Tohoku Fukushi University<br>Emsley, Richard; University of Manchester and Manchester Academic Health Sciences Centre, Health Methodology Research Group, Department of Biostatistics |
| <b>Primary Subject Heading</b>: | Mental health                                                                                                                                                                                                                                                                                                                                                                                                                                                                                                                                                                                                                                        |
| Secondary Subject Heading:      | Paediatrics, Mental health, Evidence-based practice, Neurology                                                                                                                                                                                                                                                                                                                                                                                                                                                                                                                                                                                       |
| Keywords:                       | Paediatric neurology < PAEDIATRICS, Child & adolescent psychiatry < PSYCHIATRY, Neurology < INTERNAL MEDICINE                                                                                                                                                                                                                                                                                                                                                                                                                                                                                                                                        |
|                                 |                                                                                                                                                                                                                                                                                                                                                                                                                                                                                                                                                                                                                                                      |

SCHOLARONE™  
Manuscripts

only

# A systematic review with meta-analysis of different models of intervention for pre-school autism: study protocol

Yoshiyuki Tachibana M.D., Ph.D.<sup>1,2</sup>, Jonathan Green M.D.<sup>1</sup>, Yeonhee Hwang Ph.D.<sup>3</sup>,  
Richard Emsley Ph.D.<sup>4</sup>

<sup>1</sup> Department of Child and Adolescent Psychiatry, University of Manchester and Manchester Academic Health Sciences Centre, UK

2. Department of Applied Brain Science, Smart Aging International Research Center, IDAC, Tohoku University, Japan

3. Special Support Education Research Center, Tohoku Fukushi University, Japan

4. Health Methodology Research Group, Department of Biostatistics, University of Manchester and Manchester Academic Health Sciences Centre, UK

Correspondence to

Yoshiyuki Tachibana M.D., Ph.D.

Department of Child and Adolescent Psychiatry, University of Manchester and Manchester Academic Health Sciences Centre

Room 4.321, Psychiatry Research Group, 4th Floor (East), Jean McFarlane Building, University Place, University of Manchester and Manchester Academic Health Sciences Centre, Oxford Road, Manchester, M13 9PL, UK

Tel/Fax: +44 (0) 161 306 7941; E-mail: yoshiyuki-tatibana@hotmail.co.jp

## ABSTRACT

**Aim:** The aims of our study are to: i) conduct a systematic review of the intervention literature in preschool autism spectrum disorder (ASD), including type of intervention that is tested and classification of outcome measures used; ii) to undertake a meta-analysis of the studies, allowing for the first time the comparison of different approaches to intervention using comparative outcomes.

**Background:** There are a number of alternative modalities of intervention for preschool ASD in use with different theoretical background and orientation, each of which tend to use different trial designs and outcome measures; and there has been no comparative review to date across intervention modality in order to inform clinical decisions. There is at this time an urgent need for comprehensive systematic review and meta-analyses of intervention studies for preschool ASD, covering studies of adequate quality across different intervention types and measurement methods, with a view to identifying the best current evidence for pre-school interventions in the disorder.

**Design and methods:** We will perform a systematic review of RCTs for preschool children with ASD, along with a meta-analysis of qualifying studies across intervention modality. We will classify the interventions for preschool ASD under three models; behaviour, multi-modal developmental, and communication-focused. Firstly, we will perform a systematic review. Then, we will conduct a meta-analysis by comparing the three models with various outcomes using an inverse variance method. We will synthesize each outcome of the studies for the three models using standardized mean differences.

**Discussion:** This study will identify each interventions strengths and weaknesses. This study may also reveal what points are lacking among the current intervention programmes for children with ASD. We strongly believe those findings will be able to translated into the clinical practices and patients and their family benefits.

## INTRODUCTION

Recent epidemiological studies estimate a prevalence of 1:100 for autism spectrum disorder (ASD) [1], which is a surprising increase over rates reported in the past [2]. There has been increasing interest in developing effective interventions for young children with ASD, since the evidence suggests that early intervention programmes are indeed beneficial for children with ASD, often improving developmental functioning and decreasing maladaptive behaviours and symptom severity [3], and also can improve outcomes in later years for most individuals [4].

An increasing volume of published trials of psychosocial intervention programmes for preschool ASD have been seen in recent years. These programmes tend to fall into three models; i) those based on behaviour change which use applied behavioural analysis (ABA); ii) those focused on therapies targeted at improving the social communication impairment, the core symptom of autism; iii) multimodal interventions targeted across areas of autistic children's development. In addition, an increasing number of these studies have followed CONSORT guidelines [5], and some meta-analyses and systematic reviews about intervention programmes for preschool children have been published [6,7,8,9,10,11]. These meta-analyses and systematic reviews focused exclusively on one or other of these groups of intervention styles; there has been no systematic review or meta-analysis of studies comparing results from different types of intervention approach from the viewpoint of the three models. For clinicians and commissioners this poses a difficulty in making general choices in a field containing often strong and partisan claims of effect from different traditions of intervention. Related to this, there has been great variation in endpoint measures used in these reported studies, making comparison of effects difficult. Specifically, there has been variation in whether endpoints have been framed in terms of autism symptom

1  
2  
3  
4  
5  
6 outcomes, non autism-specific outcomes, or intermediate developmental endpoints; and  
7  
8 these latter two have often been reported as if they were surrogate endpoints for  
9  
10 autism-specific symptoms or disorder. We think that these considerations indicate the  
11  
12 need for a more comprehensive review of intervention studies for preschool ASD,  
13  
14 covering studies of adequate quality across different intervention types and  
15  
16 measurement methods, with a view to identifying the best current evidence for  
17  
18 preschool interventions in the disorder. In this study, we will investigate it by  
19  
20 comparing three major types of interventions with various outcomes.  
21  
22

23  
24 We will undertake a systematic review and a meta-analysis of RCTs for preschool  
25  
26 children with ASD. Recently many RCTs for children with ASD have been emerged as  
27  
28 sufficient as to perform meta-analyses. RCT methodology has been identified as the  
29  
30 gold standard in efficacy research [12,13]. In addition, meta-analyses of RCTs is the top  
31  
32 hierarchy of evidence based medicine [14]. Thus, the findings of this study will be very  
33  
34 strong evidence about interventions for children with ASD. We classify the  
35  
36 interventions for preschool children with ASD under the three models; i.e. behaviour  
37  
38 model, developmental model, and communication-focused model. Understanding the  
39  
40 mechanisms that underlie this attenuation of treatment effects and how these can be  
41  
42 overcome is one current challenge [15]. This study will reveal which type of  
43  
44 interventions is the most effective to various kinds of treatment factors respectively. Its  
45  
46 findings will guide us to develop new types of interventions to overcome the attenuation  
47  
48 of treatment effects in the core symptoms of autism. It will contribute to the appropriate  
49  
50 choices of the interventions for children with ASD for their families, clinicians, and the  
51  
52 policymakers.  
53  
54

55  
56 The objective of our study is to: i) conduct a systematic review of all the preschool  
57  
58 intervention literature in ASD, including the type of intervention that is being tested and  
59  
60

1  
2  
3  
4  
5  
6 classification of outcome measures used; ii) to undertake a meta-analysis of  
7 methodologically adequate studies using the Cochrane tool, which will allow for the  
8 first time comparison of different approaches to intervention on comparative outcome  
9 measures.  
10  
11  
12

## 13 14 15 16 17 18 **METHODS**

### 19 20 21 **Types of studies**

22  
23  
24 We will include randomized controlled trials and subject these to a rating on quality  
25 criteria.  
26  
27  
28  
29  
30  
31

### 32 33 **Types of participants**

34  
35  
36 Participants comprise preschool children with a diagnosis of autism spectrum disorder  
37 (ASD) aged 0 to 6.  
38  
39  
40  
41  
42  
43

### 44 45 **Types of interventions**

46  
47 We classify interventions for preschool ASD in three groups; i) behavioural  
48 interventions – based essentially on learning theory and on applied behaviour analysis;  
49 ii) communication-focused interventions, targeting social communication impairment,  
50 as the core symptom of autism; iii) multimodal developmental interventions targeting a  
51 range of aspects of children's development.  
52  
53  
54  
55  
56  
57  
58  
59  
60

## Types of outcome measures

A feature of this review is that we will systematically classify the various outcome measures used within recent intervention trials into the following categories:

### *Primary outcomes*

Autism behavioural symptoms: qualitative impairment in social interaction; qualitative impairment in communication; restricted repetitive and stereotyped patterns of behaviour, interests, and activities. These are the triad of diagnostic criteria for autism in Diagnostic and Statistical Manual of Mental Disorders-IV-TR [16] and the definitional symptoms of the disorder and key indicators of psychopathology.

### *Secondary outcomes*

Non-specific developmental outcomes. These are not directly related by definition to autism diagnosis but are used in some studies as substitute outcomes – examples are IQ and cognitive development.

Intermediate outcomes relevant to the known development of autism – which might be candidates for surrogate endpoints. These outcomes are often defined as the proximal targets of intervention approaches from a developmental perspective. Examples are: measures of joint attention, parent-child interaction, imitation ability, symbolic play, social communication in an interactive setting, receptive language, expressive language.

## Electronic searches

1  
2  
3  
4  
5  
6 We will do a systematic review of the published work according to the PRISMA  
7 statement [17]. Relevant studies will be identified by searching the following data  
8 sources: PsycINFO (from 1956 to January, 2011), Medline via Ovid (from 1950 to  
9 January, 2011), ERIC (from 1950 to January, 2011) and the Cochrane database.  
10  
11  
12

13  
14 We will use the following search terms to search all trials registers and databases:  
15 “autism” , “autism spectrum disorder”, “ASD”, “high function autism”, “high function  
16 ASD”, “Asperger syndrome”, “pervasive developmental disorder”, “PDDNOS”,  
17 “intervention”, “communication”, "interpersonal", "speech", "interaction", "synchrony",  
18 “relationship”, “language”, “social” and “development”, "behavior therapy", "intensive  
19 behavioral intervention". Their search will be limited by age group from 1 to 6 years old  
20 and “randomized controlled trial.” This search strategy has been peer-reviewed by a  
21 librarian of University of Manchester.  
22  
23  
24  
25  
26  
27  
28  
29  
30  
31  
32  
33  
34  
35  
36

### 37 **Validity assessment**

38 Two of the authors, Y.T., Y.H. independently will review abstracts of potentially the  
39 relevant studies. This will be followed by a consensus discussion with J.G. The quality  
40 of the RCTs will be coded independently by Y.T. and Y.H. and disagreement will be  
41 resolved by consensus discussions.  
42  
43  
44  
45  
46  
47  
48  
49  
50

### 51 **Searching other resources**

52  
53 Reference lists from identified trials and review articles will be manually scanned to  
54 identify any other relevant studies. The clinicalTrials.gov and the Cochrane Library  
55  
56  
57  
58  
59  
60



1  
2  
3  
4  
5  
6 website will be also searched for randomized trials that were registered as completed  
7  
8 but not yet published.  
9

## 10 11 12 13 14 **Data collection and analysis**

### 15 16 17 *Selection of studies*

#### 18 19 20 *Inclusion:*

- 21  
22  
23 1. Participants comprise preschool children with a diagnosis of ASD or pervasive  
24  
25 developmental disorder (PDD).  
26  
27
- 28  
29 2. Randomized controlled trials  
30  
31
- 32  
33 3. Interventions delivered to the parents/guardians and/or directly to the child, by  
34  
35 special educators, teachers, speech pathologists, psychologists, or other allied health  
36  
37 professional students will be included.  
38
- 39  
40 4. Studies carried out while the children were at a preschool age between 0 and 6 years.  
41
- 42  
43 5. The control group will be those who did not received early intervention for autism.  
44
- 45  
46 6. Studies judged to be in low risk of bias according to the Cochrane Collaboration tool  
47  
48 for assessing risk of bias  
49

#### 50 51 *Exclusion:*

- 52  
53  
54 1. The study was not primary research on preschool autism.  
55  
56
- 57  
58 2. The study did not assess a cognitive/behavioural intervention for preschool autism.  
59  
60

1  
2  
3  
4  
5  
6 3. The study did not report adequately on any measurable data for health related  
7  
8 outcomes relevant to the review.  
9

10  
11 4. The study design was not a randomized controlled trial.  
12

13  
14 5. The intervention used alternative medicine.  
15

16  
17 6. The intervention was pharmacological one.  
18

19  
20 7. The intervention was not classified into behavioural, multimodal developmental or  
21  
22 communication-focused model.  
23

24  
25 8. The control group received some early intervention for children with autism.  
26

27  
28 9. Studies judged to be in high risk of bias according to the Cochrane Collaboration tool  
29  
30 for assessing risk of bias  
31

32  
33  
34  
35  
36  
37 All citations sourced from the search strategy will be transferred to EndNote, a  
38  
39 reference management database software. Initial screening of titles and abstracts by an  
40  
41 experienced research fellow (YT) will eliminate all those citations obviously irrelevant  
42  
43 to the topic, for example, prevalence studies, studies not relating to autism spectrum  
44  
45 disorders, single case studies. Thereafter, two review authors (YT and YH) will assess  
46  
47 and select studies for inclusion from the group of superficially relevant studies. In the  
48  
49 event of a disagreement, resolution will be reached in discussion with the third author  
50  
51 (JG), if necessary following inspection of the full paper.  
52  
53  
54  
55  
56  
57  
58  
59  
60

## Data extraction and management

YT and YH will independently extract data from selected trials using a specially designed data extraction form. Extracted data will consist of methods (dose and frequency of intervention); diagnostic description of participants, and type of intervention, including target, intensity, duration and method of application (parent-mediated, therapist, school-based etc.). Data will be extracted independently by two review authors (YT and YH) and disagreements will be resolved by negotiation with a third author (JG).

## Assessment of risk of bias in included studies

Risk of bias will be assessed by two independent review authors (YT and YH) and disagreements will be resolved by negotiation with a third review author (JG). We will use the Cochrane Collaboration tool for assessing risk of bias in these areas [18]. The assessed risk of bias in studies will include in the following domains: sequence generation; allocation concealment; blinding; incomplete outcome data; selective outcome reporting; other sources of bias. The process will involve recording the appropriate information for each study (for example describing the method used to conceal allocation in detail) and evaluating whether there is risk of bias in that area (for example, was allocation adequately concealed). We will allocate studies to the three categories according to our judgment of each area or potential risk of bias: A. Low risk of bias; B. Moderate (or unclear) risk of bias; C. High risk of bias.

### Measures of treatment effect

The categories of outcome measure differ conceptually in important ways, and have been used in a systematic different way across trials of the different intervention types identified above. Our review aims for the first time to make comparison across these different types of intervention study, thus we will standardize and synthesize the various categories of outcome measure using an inverse variance method. The measures used for outcome are varied between studies and the standardized data will be heterogeneous. We will use a random effects model for the analyses, comparing type of intervention model effectiveness for each outcome using a standardized mean difference. This is a novel approach for this field.

### Dealing with missing data

Missing data will be assessed for each individual study. Where a loss of significant quantities of participant data is reported such that the review authors agree that the conclusions of the study are compromised, trial authors will be contacted. If no reply is forthcoming or full data are not made available, these studies will not be included in the final analysis. For included studies reporting drop-out, we will report the number of participants included in the final analysis as a proportion of those participants who began the intervention. Reasons for missing data will be reported. The extent to which the results of the review could be altered by the missing data will be assessed and discussed. If summary data are missing, trial authors will be contacted. If no reply is forthcoming or the required summaries are not made available, the authors will include the study in the review and assess and discuss the extent to which its absence from meta-analysis affects the review results.

### **Assessment of heterogeneity**

Consistency of results will be assessed visually and by a Chi<sup>2</sup> test. If the meta-analysis includes only a small number of studies, or where studies have small sample sizes, a P value of 0.10 will be applied for statistical significance. In addition, since Chi<sup>2</sup> can have low power when only few studies or studies of a small sample size are available, we will use the I<sup>2</sup> statistic to calculate the degree to which heterogeneity is having an impact on the analysis (Higgins 2008).

### **Assessment of reporting biases**

If sufficient studies are found, funnel plots will be drawn to investigate any relationship between effect size and sample size. Such a relationship could be due to publication or related biases, or due to systematic differences between small and large studies. If a relationship is identified, clinical diversity of the studies will be further examined as a possible explanation. Every attempt will be made to obtain unpublished data and data from conference proceedings.

### **Data synthesis**

Data synthesis will be performed using Review Manager version 5.1 (Cochrane Collaboration software). We will assess continuous and binary data. Assuming that two or more studies that are suitable for inclusion are found, and that the studies are

1  
2  
3  
4  
5  
6 considered to be homogenous, a meta-analysis will be performed on the results. The  
7  
8 categories of outcome measure mentioned above differ conceptually in important ways,  
9  
10 and have been used in a systematic different way across trials of the different  
11  
12 intervention types identified above. Our review aims to make comparison across these  
13  
14 different types of intervention study, thus we will standardize and synthesize the various  
15  
16 categories of outcome measure using an inverse variance method. The measures used  
17  
18 for outcome are varied between studies and the standardized data will be heterogeneous.  
19  
20 We will use a random effects model for the analyses, since we do not assume that each  
21  
22 study is estimating exactly the same quantity. We will compare the types of intervention  
23  
24 model effectiveness for each outcome using a standardized mean difference.  
25  
26  
27  
28  
29

### 30 **Subgroup analysis and investigation of heterogeneity**

31  
32  
33 We will undertake subgroup analyses and meta-regression and where no significant  
34  
35 heterogeneity of effect sizes is found, these will be pooled to calculate a final effect size.  
36  
37 While these analyses may enable us to hypothesize as to possible causes of differences  
38  
39 between studies' findings, some heterogeneity is likely to remain, and any statistical  
40  
41 analysis will be accompanied by a narrative synthesis.  
42  
43  
44

45 Subgroup analysis will be undertaken if clinically different interventions are  
46  
47 identified, or there are clinically relevant differences between participant groups.

48 Anticipated clinically relevant differences are:

- 49 1. intervention delivery type (e.g. therapist, parent-mediated, school-based) and length
- 50 2. intervention target skill (e.g. Theory of Mind as a whole, joint attention, emotion
- 51 recognition, false belief understanding)
- 52
- 53
- 54
- 55
- 56
- 57
- 58
- 59
- 60

1  
2  
3  
4  
5  
6 3. participant age (e.g. preschool, young children, adolescents, adults), IQ (low versus  
7 normal or high), specific diagnosis and verbal ability.  
8  
9

### 10 11 12 13 14 **Sensitivity analysis**

15  
16  
17 Relevant subgroups analyses will include:

18  
19  
20 ·Severity of autism at baseline. This is a crucial element in evaluating autism studies.  
21

22  
23 ·SES and other demographic variables. Sampling bias and external validity of studies is  
24 an important consideration.  
25  
26

27  
28 ·Age of child  
29

30  
31 ·Type of intervention (our 3 groups as above)  
32  
33

34  
35 ·Parent-mediated vs child-mediated intervention delivery. A key distinguishing point  
36 between different studies in the area.  
37  
38

39  
40 ·Cognitive ability at baseline.  
41  
42

43 Sensitivity analysis will be conducted to assess the impact of study quality on the results  
44 of the meta-analyses. For example, we will test to see if studies with high rates of loss to  
45 follow up or inadequate blinding are more likely to show positive outcomes and also to  
46 assess the impact of imputing missing data.  
47  
48  
49  
50

## 51 52 53 54 55 **DISCUSSION**

1  
2  
3  
4  
5  
6 We believe that the findings of this systematic review and meta-analysis will have  
7 important implications for both clinical practice and research. Meta-analysis of  
8 randomized controlled trials of the interventions for preschool children with ASD will  
9 provide the most reliable basis for the decisions of early interventions for them.  
10 Analyses as to the three representative models: behavioural, multimodal developmental  
11 or communication-focused models will guide future clinical practice and research trials  
12 for children with ASD. This study will provide information about which kind of  
13 intervention has strength points and weak points, and what are those strength points and  
14 weak points are. This study may also reveal what points are lacking among the current  
15 intervention programmes for children with ASD. We strongly believe those findings  
16 will be able to translated into the clinical practices and patients and their family  
17 benefits.  
18  
19  
20  
21  
22  
23  
24  
25  
26  
27  
28  
29  
30  
31

32 **Authors' contribution** YT and JG contributed to draft the protocol and develop a  
33 search strategy. YT also drafted this manuscript. RE contributed to provide statistical  
34 advice for the design and the analysis. All authors read and approved the final  
35 manuscript.  
36  
37  
38  
39

40 **Acknowledgement** We thank Claire Hodkinson for peer-reviewing the search strategy  
41 of this study.  
42  
43

44 **Competing interests** None.  
45

46 **Funding** This study was supported by 'Tohoku University Young Scientist Dispatch  
47 Program'.  
48  
49  
50

## 51 52 53 **References**

- 54 1. Baird G, Simonoff E, Pickles A, Chandler S, Loucas T, et al. (2006) Prevalence of  
55 disorders of the autism spectrum in a population cohort of children in South  
56  
57  
58  
59  
60



- 1  
2  
3  
4  
5  
6  
7  
8  
9  
10  
11  
12  
13  
14  
15  
16  
17  
18  
19  
20  
21  
22  
23  
24  
25  
26  
27  
28  
29  
30  
31  
32  
33  
34  
35  
36  
37  
38  
39  
40  
41  
42  
43  
44  
45  
46  
47  
48  
49  
50  
51  
52  
53  
54  
55  
56  
57  
58  
59  
60
- Thames: the Special Needs and Autism Project (SNAP). *The lancet* 368: 210-215.
2. Newschaffer CJ, Croen LA, Daniels J, Giarelli E, Grether JK, et al. (2007) The epidemiology of autism spectrum disorders\*. *Annu Rev Public Health* 28: 235-258.
  3. Rogers SJ, Vismara LA (2008) Evidence-based comprehensive treatments for early autism. *Journal of clinical child and adolescent psychology: the official journal for the Society of Clinical Child and Adolescent Psychology, American Psychological Association, Division 53* 37: 8.
  4. Office USGA, Rights USCHCoGRSoH, Wellness (2005) Special education: children with autism: report to the Chairman and Ranking Minority Member, Subcommittee on Human Rights and Wellness, Committee on Government Reform, House of Representatives: DIANE Publishing.
  5. Campbell MK, Elbourne DR, Altman DG (2004) CONSORT statement: extension to cluster randomised trials. *BMJ Publishing Group Ltd.* pp. 702-708.
  6. Spreckley M, Boyd R (2009) Efficacy of applied behavioral intervention in preschool children with autism for improving cognitive, language, and adaptive behavior: a systematic review and meta-analysis. *The Journal of pediatrics* 154: 338-344.
  7. Reichow B, Wolery M (2009) Comprehensive synthesis of early intensive behavioral interventions for young children with autism based on the UCLA young autism project model. *Journal of autism and developmental Disorders* 39: 23-41.
  8. Makrygianni MK, Reed P (2010) A meta-analytic review of the effectiveness of behavioural early intervention programs for children with autistic spectrum disorders. *Research in Autism Spectrum Disorders* 4: 577-593.
  9. Eldevik S, Hastings RP, Hughes JC, Jahr E, Eikeseth S, et al. (2009) Meta-analysis of early intensive behavioral intervention for children with Autism. *Journal of*

1  
2  
3  
4  
5  
6  
7  
8  
9  
10  
11  
12  
13  
14  
15  
16  
17  
18  
19  
20  
21  
22  
23  
24  
25  
26  
27  
28  
29  
30  
31  
32  
33  
34  
35  
36  
37  
38  
39  
40  
41  
42  
43  
44  
45  
46  
47  
48  
49  
50  
51  
52  
53  
54  
55  
56  
57  
58  
59  
60

Clinical Child and Adolescent Psychology 38: 12.

10. Wallace KS, Rogers SJ (2010) Intervening in infancy: implications for autism spectrum disorders. *Journal of Child Psychology and Psychiatry*.
11. Ospina MB, Seida JK, Clark B, Karkhaneh M, Hartling L, et al. (2008) Behavioural and developmental interventions for autism spectrum disorder: a clinical systematic review. *PLoS One* 3: e3755.
12. Lord C, Wagner A, Rogers S, Szatmari P, Aman M, et al. (2005) Challenges in evaluating psychosocial interventions for autistic spectrum disorders. *Journal of autism and developmental Disorders* 35: 695-708.
13. Smith T, Scahill L, Dawson G, Guthrie D, Lord C, et al. (2007) Designing research studies on psychosocial interventions in autism. *Journal of autism and developmental Disorders* 37: 354-366.
14. Summerskill WSM (2001) *Hierarchy of evidence. Key Topics in Evidence Based Medicine* Oxford: Bios Scientific Publishers.
15. Charman T (2011) Commentary: Glass half full or half empty? Testing social communication interventions for young children with autism-reflections on Landa, Holman, O'Neill, and Stuart (2011). *Journal of Child Psychology and Psychiatry* 52: 22-23.
16. Association AP, DSM-IV. APATFo (2000) *Diagnostic and statistical manual of mental disorders: DSM-IV-TR*: American Psychiatric Publishing, Inc.
17. Moher D, Liberati A, Tetzlaff J, Altman DG (2009) Preferred reporting items for systematic reviews and meta-analyses: the PRISMA statement. *PLoS Medicine* 6: e1000097.
18. Higgins J, Green S (2011) *Cochrane Handbook for Systematic Reviews of Interventions* Version 5.1.0 [updated March 2011]. The Cochrane Collaboration.

1  
2  
3  
4  
5  
6  
7  
8  
9  
10  
11  
12  
13  
14  
15  
16  
17  
18  
19  
20  
21  
22  
23  
24  
25  
26  
27  
28  
29  
30  
31  
32  
33  
34  
35  
36  
37  
38  
39  
40  
41  
42  
43  
44  
45  
46  
47  
48  
49  
50  
51  
52  
53  
54  
55  
56  
57  
58  
59  
60

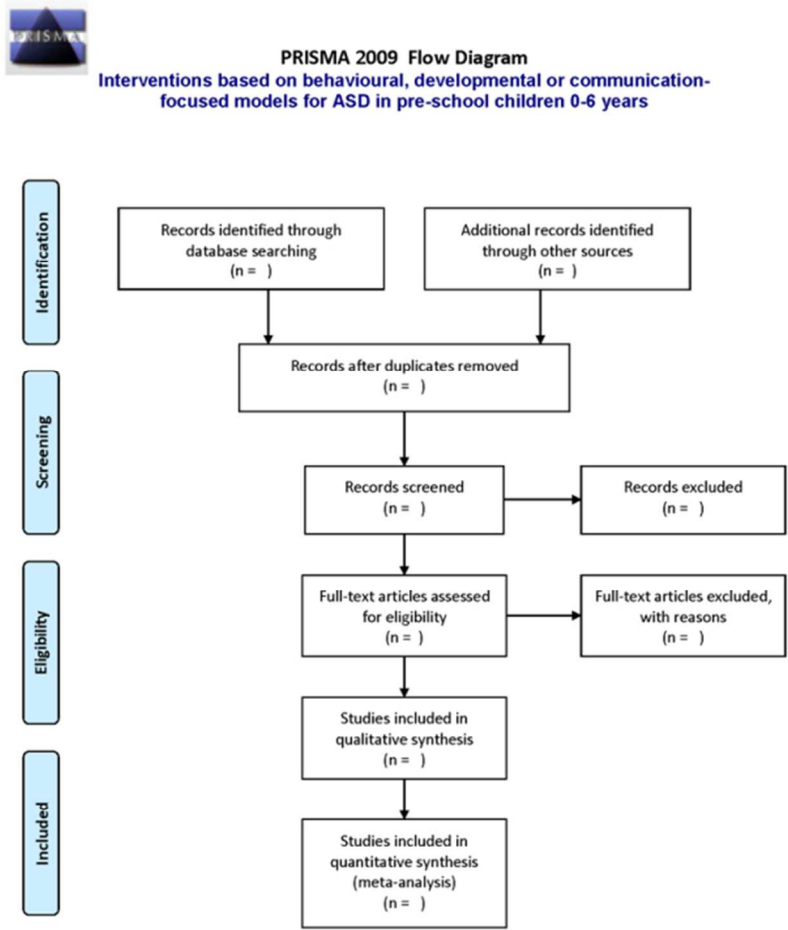

From: Moher D, Liberati A, Tetzlaff J, Altman DG, The PRISMA Group (2009). Preferred Reporting Items for Systematic Reviews and Meta-Analyses: The PRISMA Statement. PLoS Med 6(6): e1000097. doi:10.1371/journal.pmed1000097  
For more information, visit [www.prisma-statement.org](http://www.prisma-statement.org).

Caption: Figure 1  
Legend: Flow diagram of this study



**A systematic review with meta-analysis of comprehensive interventions for preschool children with autism spectrum disorder: study protocol**

|                                 |                                                                                                                                                                                                                                                                                                                                                                                                                                                                                                                                                                                                                                                       |
|---------------------------------|-------------------------------------------------------------------------------------------------------------------------------------------------------------------------------------------------------------------------------------------------------------------------------------------------------------------------------------------------------------------------------------------------------------------------------------------------------------------------------------------------------------------------------------------------------------------------------------------------------------------------------------------------------|
| Journal:                        | <i>BMJ Open</i>                                                                                                                                                                                                                                                                                                                                                                                                                                                                                                                                                                                                                                       |
| Manuscript ID:                  | bmjopen-2011-000679.R1                                                                                                                                                                                                                                                                                                                                                                                                                                                                                                                                                                                                                                |
| Article Type:                   | Protocol                                                                                                                                                                                                                                                                                                                                                                                                                                                                                                                                                                                                                                              |
| Date Submitted by the Author:   | 23-Dec-2011                                                                                                                                                                                                                                                                                                                                                                                                                                                                                                                                                                                                                                           |
| Complete List of Authors:       | Tachibana, Yoshiyuki; University of Manchester and Manchester Academic Health Sciences Centre, Department of Child and Adolescent Psychiatry; Smart Aging International Research Center, IDAC, Tohoku University, Department of Applied Brain Science<br>Green, Jonathan; University of Manchester and Manchester Academic Health Sciences Centre, Department of Child and Adolescent Psychiatry<br>Hwang, Yeonhee; Special Support Education Research Center, Tohoku Fukushi University,<br>Emsley, Richard; University of Manchester and Manchester Academic Health Sciences Centre, Health Methodology Research Group, Department of Biostatistics |
| <b>Primary Subject Heading</b>: | Mental health                                                                                                                                                                                                                                                                                                                                                                                                                                                                                                                                                                                                                                         |
| Secondary Subject Heading:      | Paediatrics, Mental health, Evidence-based practice, Neurology                                                                                                                                                                                                                                                                                                                                                                                                                                                                                                                                                                                        |
| Keywords:                       | Paediatric neurology < PAEDIATRICS, Child & adolescent psychiatry < PSYCHIATRY, Neurology < INTERNAL MEDICINE                                                                                                                                                                                                                                                                                                                                                                                                                                                                                                                                         |
|                                 |                                                                                                                                                                                                                                                                                                                                                                                                                                                                                                                                                                                                                                                       |

SCHOLARONE™  
Manuscripts

1  
2  
3  
4  
5  
6  
7  
8  
9  
10  
11  
12  
13  
14  
15  
16  
17  
18  
19  
20  
21  
22  
23  
24  
25  
26  
27  
28  
29  
30  
31  
32  
33  
34  
35  
36  
37  
38  
39  
40  
41  
42  
43  
44  
45  
46  
47  
48  
49  
50  
51  
52  
53  
54  
55  
56  
57  
58  
59  
60

# A systematic review with meta-analysis of comprehensive interventions for preschool children with autism spectrum disorder: study protocol

Yoshiyuki Tachibana M.D., Ph.D.<sup>1,2</sup>, Jonathan Green M.D.<sup>1</sup>, Yeonhee Hwang Ph.D.<sup>3</sup>,  
Richard Emsley Ph.D.<sup>4</sup>

<sup>1</sup> Department of Child and Adolescent Psychiatry, University of Manchester and Manchester Academic Health Sciences Centre, UK

2. Department of Applied Brain Science, Smart Aging International Research Center, IDAC, Tohoku University, Japan

3. Special Support Education Research Center, Tohoku Fukushi University, Japan

4. Health Methodology Research Group, Department of Biostatistics, University of Manchester and Manchester Academic Health Sciences Centre, UK

Correspondence to

Yoshiyuki Tachibana M.D., Ph.D.

Department of Child and Adolescent Psychiatry, University of Manchester and Manchester Academic Health Sciences Centre

Room 4.321, Psychiatry Research Group, 4<sup>th</sup> Floor (East), Jean McFarlane Building, University Place, University of Manchester and Manchester Academic Health Sciences Centre, Oxford Road, Manchester, M13 9PL, UK

Tel/Fax: +44 (0) 161 306 7941; E-mail: yoshiyuki-tatibana@hotmail.co.jp

## ABSTRACT

**Introduction:** The aims of our study are to: i) conduct a systematic review of the intervention literature in preschool autism spectrum disorder (ASD), including type of intervention that is tested and classification of outcome measures used; ii) to undertake a meta-analysis of the studies, allowing for the first time the comparison of different approaches to intervention using comparative outcomes. There are a number of alternative modalities of intervention for preschool ASD in use with different theoretical background and orientation, each of which tend to use different trial designs and outcome measures. There is at this time an urgent need for comprehensive systematic review and meta-analyses of intervention studies for preschool ASD, covering studies of adequate quality across different intervention types and measurement methods, with a view to identifying the best current evidence for preschool interventions in the disorder.

**Methods and analysis:** We will perform a systematic review of RCTs for preschool children with ASD aged 0 to 6, along with a meta-analysis of qualifying studies across intervention modality. We will classify the interventions for preschool ASD under three models; behaviour, multi-modal developmental, and communication-focused. Firstly, we will perform a systematic review. Then, we will conduct a meta-analysis by comparing the three models with various outcomes using an inverse variance method in a random effect model. We will synthesize each outcome of the studies for the three models using standardized mean differences.

**Dissemination and ethics:** This study will identify each intervention's strengths and weaknesses. This study may also suggest what kinds of elements future intervention programmes for children with ASD should have. We strongly believe those findings will be able to translated into the clinical practices and patients and their family benefits.

**Trial registration:**

[http://www.crd.york.ac.uk/prospero/register\\_new\\_review.asp?RecordID=1349&UserID](http://www.crd.york.ac.uk/prospero/register_new_review.asp?RecordID=1349&UserID)

1  
2  
3  
4  
5  
6  
7  
8  
9  
10  
11  
12  
13  
14  
15  
16  
17  
18  
19  
20  
21  
22  
23  
24  
25  
26  
27  
28  
29  
30  
31  
32  
33  
34  
35  
36  
37  
38  
39  
40  
41  
42  
43  
44  
45  
46  
47  
48  
49  
50  
51  
52  
53  
54  
55  
56  
57  
58  
59  
60

=230 (Registration No. CRD42011001349)

For peer review only

## INTRODUCTION

Recent epidemiological studies estimate a prevalence of 1:100 for autism spectrum disorder (ASD) <sup>1</sup>, which is a surprising increase over rates reported in the past <sup>2</sup>. There has been increasing interest in developing effective interventions for young children with ASD, since the evidence suggests that early intervention programmes are indeed beneficial for children with ASD, often improving developmental functioning and decreasing maladaptive behaviours and symptom severity <sup>3</sup>, and also can improve outcomes in later years for most individuals <sup>4</sup>.

An increasing volume of published trials of psychosocial intervention programmes for preschool ASD have been seen in recent years. These programmes tend to fall into three models; i) those based on behaviour change which use applied behavioural analysis (ABA); ii) those focused on therapies targeted at improving the social communication impairment, the core symptom of autism; iii) multimodal interventions targeted across areas of autistic children's development. In addition, an increasing number of these studies have followed CONSORT guidelines <sup>5</sup>, and some meta-analyses and systematic reviews about intervention programmes for preschool children have been published; e.g. <sup>6-8</sup>. These meta-analyses and systematic reviews focused exclusively on one or other of these groups of intervention styles; there has been no systematic review or meta-analysis of studies comparing results from different types of intervention approach from the viewpoint of the three models. For clinicians and commissioners this poses a difficulty in making general choices in a field containing often strong and partisan claims of effect from different traditions of intervention. Related to this, there has been great variation in endpoint measures used in these reported studies, making comparison of effects difficult. Specifically, there has been variation in whether endpoints have been framed in terms of autism symptom outcomes, non autism-specific outcomes, or intermediate developmental endpoints; and these latter two have often



1  
2  
3  
4  
5  
6 been reported as if they were surrogate endpoints for autism-specific symptoms or  
7 disorder. We think that these considerations indicate the need for a more comprehensive  
8 review of intervention studies for preschool ASD, covering studies of adequate quality  
9 across different intervention types and measurement methods, with a view to identifying  
10 the best current evidence for preschool interventions in the disorder. In this study, we  
11 will investigate it by comparing three major types of interventions with various  
12 outcomes.  
13  
14  
15  
16  
17  
18  
19

20 We will undertake a systematic review and a meta-analysis of RCTs for preschool  
21 children with ASD. Recently many RCTs for children with ASD have been emerged as  
22 sufficient as to perform meta-analyses. RCT methodology has been identified as the  
23 gold standard in efficacy research <sup>9</sup>. In addition, meta-analyses of RCTs is the top  
24 hierarchy of evidence based medicine <sup>10</sup>. Thus, the findings of this study will be very  
25 strong evidence about interventions for children with ASD. Howlin et al. are asserting  
26 that there are three main strands of early interventions for children with ASD): programs  
27 with a particular emphasis on the use of behavioural principle to improve learning and  
28 behaviour; those that have a specific focus on communication; and those in which  
29 developmental/educational strategies have been employed <sup>11</sup>. In this study, we named  
30 those strands as behavioural, communication-focused, and multimodal developmental  
31 interventions, respectively. Understanding the mechanisms that underlie this attenuation  
32 of treatment effects and how these can be overcome is one current challenge <sup>12</sup>. This  
33 study may reveal each type of the intervention's strong and weak points to various kinds  
34 of treatment factors respectively. Its findings will guide us to develop new types of  
35 interventions to overcome the attenuation of treatment effects in the core symptoms of  
36 autism. It will contribute to the appropriate choices of the interventions for children  
37 with ASD for their families, clinicians, and the policymakers.  
38  
39  
40  
41  
42  
43  
44  
45  
46  
47  
48  
49  
50  
51  
52  
53  
54  
55  
56  
57  
58  
59  
60

1  
2  
3  
4  
5  
6 The objective of our study is to: i) conduct a systematic review of all the preschool  
7 intervention literature in ASD, including the type of intervention that is being tested and  
8 classification of outcome measures used; ii) to undertake a meta-analysis of  
9 methodologically adequate studies using the Cochrane tool, which will allow for the  
10 first time comparison of different approaches to intervention on comparative outcome  
11 measures.  
12  
13  
14  
15  
16  
17  
18  
19

## 20 **METHODS**

### 21 **Types of studies**

22 We will include randomized controlled trials and subject these to a rating on quality  
23 criteria.  
24  
25  
26  
27  
28  
29

### 30 **Types of participants**

31 Participants comprise preschool children aged 0 to 6 with a diagnosis of ASD as below.  
32  
33 Diagnostic and statistical Manual of Mental Disorders-IV-Text Revision (DSM-IV-TR)  
34  
35  
36  
37 13

- 38 ▪ Autistic disorder
- 39
- 40 ▪ Asperger disorder
- 41
- 42 ▪ Pervasive developmental disorder not otherwise specified (PDD-NOS)
- 43
- 44

45 International Classification of Diseases-10 (ICD-10) <sup>14</sup>

- 46 ▪ Childhood autism
- 47
- 48 ▪ Asperger syndrome, atypical autism
- 49
- 50 ▪ Other pervasive developmental disorders
- 51
- 52 ▪ Pervasive developmental disorders, unspecified.
- 53
- 54
- 55
- 56
- 57
- 58
- 59
- 60

### **Types of interventions**

We classify interventions for preschool ASD in three groups; i) behavioural interventions – based essentially on learning theory and on applied behaviour analysis; ii) communication-focused interventions, targeting social communication impairment, as the core symptom of autism; iii) multimodal developmental interventions targeting a range of aspects of children’s development.

### **Types of outcome measures**

A feature of this review is that we will systematically classify the various outcome measures used within recent intervention trials into the following categories:

#### *Primary outcomes*

Autism behavioural symptoms: qualitative impairment in social interaction; qualitative impairment in communication; restricted repetitive and stereotyped patterns of behaviour, interests, and activities. These are the triad of diagnostic criteria for autism in DSM-IV-TR and the definitional symptoms of the disorder and key indicators of psychopathology (e.g. the autism Diagnostic Observation Schedule-Generic<sup>15</sup> will be used for these outcomes.).

#### *Secondary outcomes*

Non-specific developmental outcomes. These are not directly related by definition to autism diagnosis but are used in some studies as substitute outcomes – examples are IQ and cognitive development (e.g. the Wechsler Preschool and Primary Scale of Intelligence third edition<sup>16</sup> will be used for these outcomes.).

Intermediate outcomes relevant to the known development of autism – which might be candidates for surrogate endpoints. These outcomes are often defined as the proximal targets of intervention approaches from a developmental perspective. Examples (along

1  
2  
3  
4  
5  
6 with appropriate measures) are: measures of adaptive behavior (the Vineland Adaptive  
7 Behavior Scale <sup>17</sup>), joint attention (the Early Social Communication Scales <sup>18</sup>), imitation  
8 ability (the Imitation Battery <sup>19</sup>), symbolic play (the Communication and Symbolic  
9 Behavior Scales Developmental Profile <sup>20</sup>), parent-child interaction (the Dyadic  
10 Communication Measure for Autism <sup>21</sup>), receptive language (the MacArthur-Bates  
11 Communicative Development Inventory (MCDI <sup>22</sup>)), expressive language (MCDI <sup>22</sup>).  
12  
13  
14  
15  
16  
17  
18  
19

### 20 **Electronic searches**

21  
22 We will do a systematic review of the published work according to the PRISMA  
23 statement <sup>23</sup>. Relevant studies will be identified by searching the following data sources:  
24 PsycINFO (from 1956 to January, 2011), Medline via Ovid (from 1950 to January,  
25 2011), ERIC (from 1950 to January, 2011) and the Cochrane database.  
26  
27  
28  
29

30 We will use the following search terms to search all trials registers and databases:  
31 “autism” , “autism spectrum disorder”, “ASD”, “high function autism”, “high function  
32 ASD”, “Asperger syndrome”, “pervasive developmental disorder”, “PDDNOS”,  
33 “intervention”, “treatment”, “therapy”, “communication”, "interpersonal", "speech",  
34 "interaction", "synchrony", “relationship”, “language”, “social” and “development”,  
35 "behavior ", "intensive behavioral intervention". Their search will be limited by age  
36 group from 0 to 6 years old and “randomized controlled trial.” This search strategy has  
37 been peer-reviewed by a librarian of University of Manchester.  
38  
39  
40  
41  
42  
43  
44  
45  
46  
47  
48

### 49 **Validity assessment**

50 Two of the authors, Y.T., Y.H. independently will review abstracts of potentially the  
51 relevant studies. This will be followed by a consensus discussion with J.G. The quality  
52  
53  
54  
55  
56  
57  
58  
59  
60

of the RCTs will be coded independently by Y.T. and Y.H. and disagreement will be resolved by consensus discussions.

### **Searching other resources**

Reference lists from identified trials and review articles will be manually scanned to identify any other relevant studies. The clinicalTrials.gov and the Cochrane Library website will be also searched for randomized trials that were registered as completed but not yet published.

### **Data collection and analysis**

#### *Selection of studies*

##### *Inclusion:*

1. Participants comprise preschool children with a diagnosis of ASD or pervasive developmental disorder (PDD).
2. Randomized controlled trials
3. Interventions delivered to the parents/guardians and/or directly to the child, by special educators, teachers, speech pathologists, psychologists, or other allied health professional students will be included.
4. Studies carried out while the children were at a preschool age between 0 and 6 years.

##### *Exclusion:*

1. The study was not primary research on preschool autism.
2. The study did not assess a cognitive/behavioural intervention for preschool autism.
3. The study design was not a randomized controlled trial.
4. Alternative or complementary medicine was used as the main intervention of the study.

1  
2  
3  
4  
5  
6 5. The intervention was pharmacological one.

7  
8 6. The intervention was not classified into behavioural, multimodal developmental or  
9 communication-focused model.

10  
11 7. The control group received a specific early intervention programme for children with  
12 autism which was not a usual treatment provided by their local services.

13  
14 8. Studies judged to be in high risk of bias according to the Cochrane Collaboration tool  
15 for assessing risk of bias

16  
17 All citations sourced from the search strategy will be transferred to EndNote, a  
18 reference management database software. Initial screening of titles and abstracts by an  
19 experienced research fellow (YT) will eliminate all those citations obviously irrelevant  
20 to the topic, for example, prevalence studies, studies not relating to autism spectrum  
21 disorders, single case studies. Thereafter, two review authors (YT and YH) will assess  
22 and select studies for inclusion from the group of superficially relevant studies. In the  
23 event of a disagreement, resolution will be reached in discussion with the third author  
24 (JG), if necessary following inspection of the full paper.  
25  
26  
27  
28  
29  
30  
31  
32  
33  
34  
35  
36  
37  
38

### 39 **Data extraction and management**

40  
41 YT and YH will independently extract data from selected trials using a specially  
42 designed data extraction form. Extracted data will consist of methods (dose and  
43 frequency of intervention); diagnostic description of participants, and type of  
44 intervention, including target, intensity, duration and method of application (parent-  
45 mediated, therapist, school-based etc.). Data will be extracted independently by two  
46 review authors (YT and YH) and disagreements will be resolved by negotiation with a  
47 third author (JG).  
48  
49  
50  
51  
52  
53  
54  
55  
56  
57  
58  
59  
60

### **Assessment of risk of bias in the studies**

Risk of bias will be assessed by two independent review authors (YT and YH) and disagreements will be resolved by negotiation with a third review author (JG). We will use the Cochrane Collaboration tool for assessing risk of bias in these areas<sup>24</sup>. The assessed risk of bias in studies will include in the following domains: sequence generation; allocation concealment; blinding; incomplete outcome data; selective outcome reporting; other sources of bias. The process will involve recording the appropriate information for each study (for example describing the method used to conceal allocation in detail) and evaluating whether there is risk of bias in that area (for example, was allocation adequately concealed). We will allocate studies to the three categories according to our judgment of each area or potential risk of bias: A. Low risk of bias; B. Moderate (or unclear) risk of bias; C. High risk of bias. Whether the studies should be included for the analyses or not will be judged individually based on the results of the risk of bias assessments.

### **Measures of treatment effect**

#### *Continuous data*

Continuous data will be analysed on the basis that the means and standard deviations are available and that there is no clear evidence of skew in the distribution.

### **Dealing with missing data**

Missing data will be assessed for each individual study. Where a loss of significant quantities of participant data is reported such that the review authors agree that the conclusions of the study are compromised, trial authors will be contacted. If no reply is forthcoming or full data are not made available, these studies will not be included in the

1  
2  
3  
4  
5  
6 final analysis. For included studies reporting drop-out, we will report the number of  
7  
8 participants included in the final analysis as a proportion of those participants who  
9  
10 began the intervention. Reasons for missing data will be reported. The extent to which  
11  
12 the results of the review could be altered by the missing data will be assessed and  
13  
14 discussed. If summary data are missing, trial authors will be contacted. If no reply is  
15  
16 forthcoming or the required summaries are not made available, the authors will include  
17  
18 the study in the review and assess and discuss the extent to which its absence from  
19  
20 meta-analysis affects the review results.

### 21 22 23 24 **Assessment of heterogeneity**

25  
26  
27 Consistency of results will be assessed visually and by chi-square tests <sup>25</sup>. In addition,  
28  
29 since chi-square can have low power when only few studies or studies of a small sample  
30  
31 size are available <sup>26</sup>, we will use the  $I^2$  statistic to calculate the degree to which  
32  
33 heterogeneity is having an impact on the analysis <sup>27</sup>.

### 34 35 36 37 38 **Assessment of reporting biases**

39  
40 If sufficient studies are found, funnel plots will be drawn to investigate any relationship  
41  
42 between effect size and sample size. Such a relationship could be due to publication or  
43  
44 related biases, or due to systematic differences between small and large studies. If a  
45  
46 relationship is identified, clinical diversity of the studies will be further examined as a  
47  
48 possible explanation. Every attempt will be made to obtain unpublished data and data  
49  
50 from conference proceedings.

### 51 52 53 54 55 **Data synthesis**



1  
2  
3  
4  
5  
6 Data synthesis will be performed using Review Manager version 5.1 (Cochrane  
7 Collaboration software). We will assess continuous and binary data. Assuming that two  
8 or more studies that are suitable for inclusion are found, and that the studies are  
9 considered to be homogenous, a meta-analysis will be performed on the results. The  
10 categories of outcome measure mentioned above differ conceptually in important ways,  
11 and have been used in a systematic different way across trials of the different  
12 intervention types identified above. Our review aims to make comparison across these  
13 different types of intervention study, thus we will standardize and synthesize the various  
14 categories of outcome measure using an inverse variance method in a random effect  
15 model<sup>27</sup>. We will compare the types of intervention model effectiveness for each  
16 outcome using a standardized mean difference.  
17  
18  
19  
20  
21  
22  
23  
24  
25  
26  
27  
28  
29

### 30 **Subgroup analysis and investigation of heterogeneity**

31  
32 We will undertake subgroup analyses and meta-regression and where no significant  
33 heterogeneity of effect sizes is found, these will be pooled to calculate a final effect size.  
34 While these analyses may enable us to hypothesize as to possible causes of differences  
35 between studies' findings, some heterogeneity is likely to remain, and any statistical  
36 analysis will be accompanied by a narrative synthesis.  
37  
38  
39  
40  
41  
42

43 Subgroup analysis will be undertaken if clinically different interventions are  
44 identified, or there are clinically relevant differences between participant groups.

45 Anticipated clinically relevant differences are:

- 46 1. intervention delivery type (e.g. therapist, parent-mediated, school-based) and length
- 47 2. intervention target skill (e.g. Theory of Mind as a whole, joint attention, emotion  
48 recognition, false belief understanding)
- 49 3. participant age (e.g. preschool, young children, adolescents, adults), IQ (low versus  
50 normal or high), specific diagnosis and verbal ability.  
51  
52  
53  
54  
55  
56  
57  
58  
59  
60

1  
2  
3  
4  
5  
6 Relevant subgroup analyses will also include:

- 7  
8 ·Severity of autism at baseline. This is a crucial element in evaluating autism studies.  
9  
10 ·Social economic status and other demographic variables. Sampling bias and external  
11 validity of studies is an important consideration.  
12  
13 ·Age of child  
14  
15 ·Type of intervention (our 3 groups as above)  
16  
17 ·Parent-mediated (directing parents to train their children, not training the children  
18 directly) vs. child-mediated (training the children directly) intervention delivery  
19  
20  
21 ·Cognitive ability at baseline  
22  
23  
24  
25  
26

### 27 **Sensitivity analysis**

28  
29 Sensitivity analysis will be conducted to assess the impact of study quality on the results  
30 of the meta-analyses. For example, we will test to see if studies with high rates of loss to  
31 follow up or inadequate blinding are more likely to show positive outcomes and also to  
32 assess the impact of imputing missing data.  
33  
34  
35  
36  
37  
38

## 39 **DISCUSSION**

40  
41 We believe that the findings of this systematic review and meta-analysis will have  
42 important implications for both clinical practice and research. Meta-analysis of RCTs of  
43 the interventions for preschool children with ASD will provide the most reliable basis  
44 for the decisions of early interventions for them. Analyses as to the three representative  
45 models: behavioural, multimodal developmental or communication-focused models will  
46 guide future clinical practice and research trials for children with ASD. This study will  
47 provide information about which kind of intervention has strength points and weak  
48 points, and what are those strength points and weak points are. This study may also  
49  
50  
51  
52  
53  
54  
55  
56  
57  
58  
59  
60

1  
2  
3  
4  
5  
6 suggest what kinds of elements future intervention programmes for children with ASD  
7  
8 should have. We strongly believe those findings will be able to translated into the  
9  
10 clinical practices and patients and their family benefits. Anticipated challenges in  
11  
12 synthesize the literature exist. The measures used for outcome are varied between  
13  
14 studies and the standardized data will be heterogeneous. We do not assume that each  
15  
16 study is estimating exactly the same quantity. Thus, we will use random effect models  
17  
18 for the analyses<sup>27</sup>. In addition, the durations of the interventions will be different among  
19  
20 the studies included in this study. We will synthesize the data regardless of the durations  
21  
22 of the interventions, and will discuss the diversity of the durations in our paper.  
23

24  
25  
26 **Authors' contribution** YT and JG contributed to draft the protocol and develop a  
27  
28 search strategy. YT also drafted this manuscript. RE contributed to provide statistical  
29  
30 advice for the design and the analysis. All authors read and approved the final  
31  
32 manuscript.  
33

34 **Acknowledgement** We thank Claire Hodkinson for peer-reviewing the search strategy  
35  
36 of this study.  
37

38 **Competing interests** None.  
39

40 **Funding** This study was supported by 'Tohoku University Young Scientist Dispatch  
41  
42 Program'.  
43  
44

## 45 46 **References** 47

- 48 1. Baird G, Simonoff E, Pickles A, Chandler S, Loucas T, Meldrum D, et al. Prevalence  
49 of disorders of the autism spectrum in a population cohort of children in South  
50 Thames: the Special Needs and Autism Project (SNAP). *The Lancet*  
51 2006;368(9531):210-15.  
52
- 53 2. Newschaffer CJ, Croen LA, Daniels J, Giarelli E, Grether JK, Levy SE, et al. The  
54  
55  
56  
57  
58  
59  
60

- 1  
2  
3  
4  
5  
6 epidemiology of autism spectrum disorders\*. *Annu. Rev. Public Health*  
7  
8 2007;28:235-58.
- 9  
10 3. Rogers SJ, Vismara LA. Evidence-based comprehensive treatments for early autism.  
11  
12 *Journal of clinical child and adolescent psychology: the official journal for the*  
13  
14 *Society of Clinical Child and Adolescent Psychology, American Psychological*  
15  
16 *Association, Division 53* 2008;37(1):8.
- 17  
18 4. Office USGA, Rights USCHCoGRSoH, Wellness. *Special education: children with*  
19  
20 *autism: report to the Chairman and Ranking Minority Member, Subcommittee on*  
21  
22 *Human Rights and Wellness, Committee on Government Reform, House of*  
23  
24 *Representatives: DIANE Publishing, 2005.*
- 25  
26 5. Campbell MK, Elbourne DR, Altman DG. CONSORT statement: extension to cluster  
27  
28 randomised trials. *Bmj* 2004;328(7441):702.
- 29  
30 6. Eldevik S, Hastings RP, Hughes JC, Jahr E, Eikeseth S, Cross S. Meta-analysis of  
31  
32 early intensive behavioral intervention for children with Autism. *Journal of*  
33  
34 *Clinical Child and Adolescent Psychology* 2009;38(3):12.
- 35  
36 7. Spreckley M, Boyd R. Efficacy of applied behavioral intervention in preschool  
37  
38 children with autism for improving cognitive, language, and adaptive behavior:  
39  
40 a systematic review and meta-analysis. *The Journal of pediatrics*  
41  
42 2009;154(3):338-44.
- 43  
44 8. Makrygianni MK, Reed P. A meta-analytic review of the effectiveness of behavioural  
45  
46 early intervention programs for children with autistic spectrum disorders.  
47  
48 *Research in Autism Spectrum Disorders* 2010;4(4):577-93.
- 49  
50 9. Smith T, Scahill L, Dawson G, Guthrie D, Lord C, Odom S, et al. Designing research  
51  
52 studies on psychosocial interventions in autism. *Journal of autism and*  
53  
54 *developmental Disorders* 2007;37(2):354-66.
- 55  
56 10. Summerskill WSM. Hierarchy of evidence. *Key Topics in Evidence Based Medicine.*  
57  
58  
59  
60

- Oxford: Bios Scientific Publishers 2001.
11. Howlin P, Magiati I, Charman T. Systematic review of early intensive behavioral interventions for children with autism. *Journal Information* 2009;114(1).
  12. Charman T. Commentary: Glass half full or half empty? Testing social communication interventions for young children with autism-reflections on Landa, Holman, O'Neil, and Stuart (2011). *Journal of Child Psychology and Psychiatry* 2011;52(1):22-23.
  13. Association AP, DSM-IV. APATFo. *Diagnostic and statistical manual of mental disorders: DSM-IV-TR*: American Psychiatric Publishing, Inc., 2000.
  14. Organization WH. *The ICD-10 classification of mental and behavioural disorders: diagnostic criteria for research*: World Health Organization, 1993.
  15. Lord C, Risi S, Lambrecht L, Cook EH, Leventhal BL, DiLavore PC, et al. The Autism Diagnostic Observation Schedule—Generic: A standard measure of social and communication deficits associated with the spectrum of autism. *Journal of autism and developmental Disorders* 2000;30(3):205-23.
  16. Wechsler D. *Wechsler Preschool and Primary Scale of intelligence third edition*: San Antonio, TX: Harcourt Assessment, Inc, 2002.
  17. Sparrow SS, Cicchetti DV. *The Vineland Adaptive Behavior Scales*: Allyn & Bacon, 1989.
  18. Mundy P, Delgado C, Block J, Venezia M, Hogan A, Seibert J. Early Social Communication Scales (ESCS). *Coral Gables, FL: University of Miami* 2003.
  19. Rogers SJ, Hepburn SL, Stackhouse T, Wehner E. Imitation performance in toddlers with autism and those with other developmental disorders. *Journal of Child Psychology and Psychiatry* 2003;44(5):763-81.
  20. Wetherby AM, Prizant BM. *Communication and Symbolic Behavior Scales: Developmental Profile*: Paul H Brookes Publishing, 2002.

- 1  
2  
3  
4  
5  
6 21. Aldred C, Green J, Adams C. A new social communication intervention for children  
7 with autism: pilot randomised controlled treatment study suggesting  
8 effectiveness. *Journal of Child Psychology and Psychiatry* 2004;45(8):1420-30.  
9  
10  
11 22. Fenson L, Marchman VA, Thal D. The MacArthur-Bates Communicative  
12 Development Inventories User's Guide and Technical Manual 2006.  
13  
14 23. Moher D, Liberati A, Tetzlaff J, Altman DG. Preferred reporting items for systematic  
15 reviews and meta-analyses: the PRISMA statement. *PLoS Medicine*  
16 2009;6(7):e1000097.  
17  
18  
19 24. Higgins J, Green S. Cochrane Handbook for Systematic Reviews of Interventions  
20 Version 5.1. 0 [updated March 2011]. *The Cochrane Collaboration* 2011.  
21  
22  
23 25. Deeks JJ, Altman DG, Bradburn MJ. Statistical Methods for Examining  
24 Heterogeneity and Combining Results from Several Studies in Meta-Analysis.  
25 *Systematic reviews in health care* 2001:285-312.  
26  
27  
28 26. Higgins J, Thompson SG, Deeks JJ, Altman DG. Measuring inconsistency in meta-  
29 analyses. *Bmj* 2003;327(7414):557.  
30  
31  
32 27. Higgins DJPT, Green S. *Cochrane handbook for systematic reviews of interventions*:  
33 Wiley Online Library, 2008.  
34  
35  
36  
37  
38  
39  
40  
41  
42  
43  
44  
45  
46  
47  
48  
49  
50  
51  
52  
53  
54  
55  
56  
57  
58  
59  
60

1  
2  
3  
4  
5  
6  
7  
8  
9  
10  
11  
12  
13  
14  
15  
16  
17  
18  
19  
20  
21  
22  
23  
24  
25  
26  
27  
28  
29  
30  
31  
32  
33  
34  
35  
36  
37  
38  
39  
40  
41  
42  
43  
44  
45  
46  
47  
48  
49  
50  
51  
52  
53  
54  
55  
56  
57  
58  
59  
60

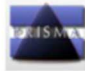

**PRISMA 2009 Flow Diagram**  
**Interventions based on behavioural, developmental or communication-focused models for ASD in pre-school children 0-6 years**

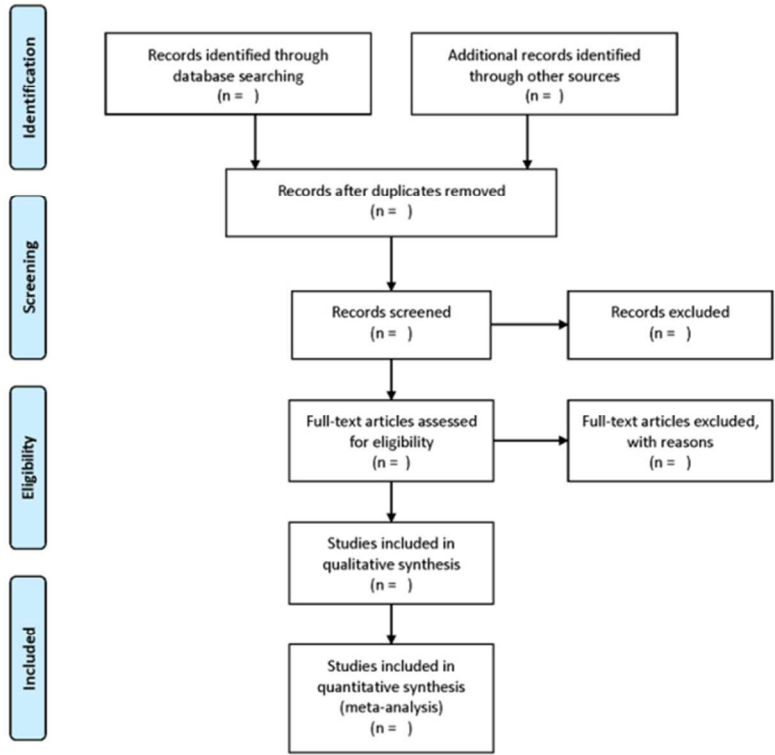

From: Moher D, Liberati A, Tetzlaff J, Altman DG, The PRISMA Group (2009). Preferred Reporting Items for Systematic Reviews and Meta-Analyses: The PRISMA Statement. PLoS Med 6(6): e1000097. doi:10.1371/journal.pmed1000097

For more information, visit [www.prisma-statement.org](http://www.prisma-statement.org).

Caption: Figure 1  
Legend: Flow diagram of this study

December 23th , 2011

The BMJ Open Editorial Office

Dear Editor,

RE: BMJ Open - Decision on Manuscript ID bmjopen-2011-000679

Thank you very much for your editorial work on our manuscript entitled "A systematic review with meta-analysis of different models of intervention for pre-school autism: study protocol". We also thank Dr. Iliana Magiati and Dr. Sigmund Eldevik for helpful suggestions and constructive criticisms. We took into account their comments in our revised manuscript.

**Responses to the managing editor's comments:**

[You may wish to consider registering your systematic review with the PROSPERO Registry: <http://www.crd.york.ac.uk/prospero/>](#)

[This registration number can then be included in your abstract.](#)

[Please structure the abstract: Introduction; Methods and analysis; Ethics and dissemination. Registration details should be included as a final section, if appropriate.](#)

We changed the Abstract structure and added the PROSPERO registry URL and the registration number as follows.

**Trial registration:**

[http://www.crd.york.ac.uk/prospero/register\\_new\\_review.asp?RecordID=1349&UserID=230](http://www.crd.york.ac.uk/prospero/register_new_review.asp?RecordID=1349&UserID=230) (Registration No. CRD42011001349)

**Responses to Dr. Iliana Magiati's comments:**

[Firstly, I am personally not aware of any systematic reviews or meta-analyses publishing their methodology/ protocol prior to publishing the actual study's findings. I have to admit that I wonder how useful it would be for the reader to read the proposed protocol of a meta-analysis without the actual findings of that particular meta-analysis. Published study protocols primarily present in detail the intervention protocol of an RCT trial and as such are potentially interesting and important, as often clinicians and professionals wish to find out more details about the theoretical background, structure, content and approach employed in different intervention outcome studies. I am also aware of a few study protocols on prospective longitudinal cohort studies, but not of](#)



1  
2  
3  
4  
5  
6 meta-analyses. I am thus not sure that reading about the inclusion and exclusion criteria  
7 and proposed methodological process of a meta-analysis serves a similarly useful  
8 function. As a reader, what I really want to read – and I think most readers would agree-  
9 is the actual results of such a meta-analysis. The information presented in this paper  
10 could be concisely presented in the Methods section of such a publication. Clearly, this  
11 is the Editor’s decision to make, but as a reviewer I question the significance of  
12 publishing a study protocol of a systematic review.  
13  
14  
15

16  
17 We take a different view to the reviewer. It is now common practice to  
18 lodge protocols prior to studies of this kind. For example, the Cochrane  
19 Library publishes research protocols for new systematic reviews and  
20 meta-analysis. They mention the reasons they publish protocols of  
21 systematic review and meta-analysis as follows.  
22

23  
24 *“All research should be carried out according to a pre-defined plan.*  
25 *Cochrane researchers use the protocol to describe the proposed approach*  
26 *for a systematic review. It outlines the question that the review authors are*  
27 *addressing, detailing the criteria against which studies will be assessed for*  
28 *inclusion in the review, and describing how the authors will manage the*  
29 *review process. Protocols contain information that defines the health*  
30 *problem and the intervention under investigation, how benefits and harms*  
31 *will be measured, and the type of appropriate study design. The protocol*  
32 *also outlines the process for identifying, assessing, and summarizing*  
33 *studies in the review. By making this information available the protocol is*  
34 *a public record of how the review authors intend to answer their research*  
35 *question.”*  
36

37 <http://www.thecochranelibrary.com/view/0/AboutCochraneSystematicReviews.html>  
38  
39  
40  
41  
42

43  
44  
45  
46 We think the same principle would hold for BMJ Open.  
47  
48

#### 49 TITLE

50 I think the title can be more precise, accurate and describe with more exact terms what  
51 will be done (i.e. comprehensive pre-school interventions for pre-school children with  
52 Autism Spectrum Disorders).  
53  
54

55 We revised the title according to your suggestion.

56 “A comprehensive systematic review with meta-analysis of pre-school interventions for  
57 children with autism spectrum disorder: study protocol”  
58  
59  
60

## ABSTRACT

Upon revision of the manuscript, the abstract also needs to be revised to be more accurate, specific and clear. Age range of children for example needs to be included in the abstract.

We have changed the description in the abstract as below.

We will perform a systematic review of RCTs for preschool children with ASD aged 0 to 6.

Non-specific terminology such as “points are lacking” also needs to be avoided.

We have changed the sentence as below.

This study may also suggest what kinds of components the future intervention programmes for children with ASD should have.

## INTRODUCTION

The description of the “three models” could improve by clearly defining/ describing these models, including some key references for these models. I will also come back to this issue in the Methods section.

Our definition follows Howlin et al. are asserting that there are three main strands of early interventions for children with ASD): programs with a particular emphasis on the use of behavioural principle to improve learning and behaviour; those that have a specific focus on communication; and those in which developmental/educational strategies have been employed (Howlin et al., 2009). In this study, we named those strands as behavioural, communication-focused, and multimodal developmental interventions, respectively.

I also believe, given the challenges and limitations of current research, that terms such as “this study will reveal which type of intervention is the most effective” are too strong to be supported by evidence and need to be revised.

We accept this and have changed text to “This study may reveal each type of the intervention’s strong and weak points.”

## METHODS

Types of studies – RCTs continue, unfortunately, to be rare in early intervention outcome studies in ASD. Thus, I wondered whether you are excluding too many studies

1  
2  
3  
4  
5  
6 by selecting only RCTs and that perhaps by including studies that are not RCTs but have  
7 a comparison/ control group and then rating them all on quality (where clearly RCTs  
8 will receive higher scores than non-RCTs) might be more informative and inclusive of a  
9 larger body of available research.

10  
11  
12 Since the number of the RCTs of early interventions for children with ASD  
13 has been increasing recently, and we think that we will have enough RCTs  
14 to analyze selected outcomes for meta-analysis in this study (Around 20  
15 RCTs will be enough to analyze and discuss appropriate outcomes in  
16 meta-analysis). We would like to avoid using non-RCTs for the analyses  
17 since this would reduce the evidence level of our conclusions.  
18  
19  
20  
21

22  
23 Types of participants – the exact age range of participants and the exact diagnosis (i.e.  
24 autism, ASD, Asperger’s PDD) need to be stated in this section and not later on, as the  
25 reader keeps wondering about these characteristics.

26  
27 We changed description of the types of participants as below.

28  
29 Participants comprise preschool children aged 0 to 6 with a diagnosis of ASD as below.

30 Diagnostic and statistical Manual of Mental Disorders-IV-Text Revision (DSM-IV-TR)

- 31  
32 ▪ Autistic disorder  
33 ▪ Asperger disorder  
34 ▪ Pervasive developmental disorder not otherwise specified (PDD-NOS)

35  
36 International Classification of Diseases-10 (ICD-10)

- 37  
38 ▪ Childhood autism  
39 ▪ Asperger syndrome, atypical autism  
40 ▪ Other pervasive developmental disorders  
41 ▪ Pervasive developmental disorders, unspecified.  
42  
43  
44

45  
46 Types of interventions – this section is, in my opinion, the most challenging one to  
47 characterize and define. You have organized interventions into three groups, but it is  
48 unclear on what basis such a structure has emerged, thus this needs to be theoretically  
49 explained and supported by evidence.

50  
51  
52 We mentioned the definition of the three models based on a reference as  
53 shown above.  
54  
55

56  
57 In addition, a major issue is that of “overlap” or “eclectic” approaches, which I am sure  
58 you are aware can often be the “norm” in ASD interventions rather than the exception.  
59  
60

1  
2  
3  
4  
5  
6 ABA-based interventions are also multimodal, they also target a range of aspects of  
7 children’s development and they also have a developmental focus, so what is of  
8 paramount importance is to clearly define and explain how you will group the  
9 interventions and how you will deal with comprehensive “eclectic” approaches. The  
10 reader needs to be clear how and why you organize the different interventions in the  
11 proposed categories.

12  
13  
14  
15 We appreciate the Reviewer’s point here. In any classification of  
16 intervention type there will be overlap situations. In our study,  
17 interventions which have elements that cross boundaries will be identified  
18 and this will be taken into account in the description and discussion phases  
19 of the study.  
20  
21  
22

23  
24 Types of outcome measures- primary measures need to be defined more clearly and I  
25 think it would be helpful to include examples of tools/ measures you will accept as  
26 measuring primary outcomes.  
27  
28

29 We added the examples of the tools/measures for the outcomes.

30 In more detail,

31  
32 *Primary outcomes*

33 Autism behavioural symptoms: qualitative impairment in social interaction; qualitative  
34 impairment in communication; restricted repetitive and stereotyped patterns of  
35 behaviour, interests, and activities. These are the triad of diagnostic criteria for autism in  
36 Diagnostic and Statistical Manual of Mental Disorders-IV-TR [16] and the definitional  
37 symptoms of the disorder and key indicators of psychopathology (e.g. the autism  
38 Diagnostic Observation Schedule-Generic (Lord et al., 2000) will be used for these  
39 outcomes.)  
40  
41  
42  
43

44  
45 *Secondary outcomes*

46 Non-specific developmental outcomes. These are not directly related by definition to  
47 autism diagnosis but are used in some studies as substitute outcomes – examples are IQ  
48 and cognitive development (e.g. the Wechsler Preschool and Primary Scale of  
49 Intelligence third edition (Wechsler, 2002) will be used for these outcomes.)  
50  
51  
52

53 Intermediate outcomes relevant to the known development of autism – which might  
54 be candidates for surrogate endpoints. These outcomes are often defined as the proximal  
55 targets of intervention approaches from a developmental perspective. Examples (along  
56 with appropriate measures) are: measures of parent-child interaction (the Dyadic  
57  
58  
59  
60

1  
2  
3  
4  
5  
6 Communication Measure for Autism; Aldred et al 2004), adaptive behavior (the  
7 Vineland Adaptive Behavior Scale; Sparrow et al., 2006), joint attention (the Early  
8 Social Communication Scales; Mundy et al., 2003), imitation ability (the Imitation  
9 Battery; Rogers et al, 2003), symbolic play (the Communication and Symbolic Behavior  
10 Scales Developmental Profile; Wetherby et al., 2002), receptive language (the  
11 MacArthur-Bates Communicative Development Inventory: Words and Gestures; Fenson  
12 et al., 2006), expressive language (the MacArthur-Bates Communicative Development  
13 Inventory; Fenson et al., 2006).

14  
15  
16  
17  
18  
19  
20 For example, it is not clear to me how qualitative impairments in social interaction and  
21 communication (primary outcome) may be that different to social communication in an  
22 interactive setting (intermediate outcome) and how you can clearly and unambiguously  
23 separate these (unless you do this by measure, in which case this section needs to be  
24 strengthened by including example measures). Adaptive behavior should also be clearly  
25 included (presumably in secondary outcome or primary outcome if you decide to  
26 measure socialization or communication subscales as primary).

27  
28  
29  
30  
31 We agree with your comment, and we deleted the outcomes, “social  
32 communication in an interactive setting”. In addition, according to your  
33 suggestion, we added the outcome, “adaptive behaviour”.

34  
35  
36  
37 Searches - The words “treatment” and “therapy” were not included in your proposed  
38 search.

39  
40 We added those terms to our proposed search. We changed the term  
41 “behavior therapy” to “behavior”.

42  
43  
44  
45 Data collection and analysis – Inclusion criteria 5 is most likely going to result in  
46 inclusion of a very small number of studies in your proposed meta-analysis, if any.  
47 Ethically, most studies cannot withhold early intervention from the control/ comparison  
48 groups, thus it is unlikely that you will find a study with a control group of children who  
49 did NOT receive early intervention for autism. Most RCTs with a waitlist control will be  
50 studies evaluating effectiveness of short-term, time-limited interventions, not  
51 comprehensive, long-term multimodal interventions such as the ones you propose to  
52 evaluate. Thus, I think it may be worthwhile reconsidering this criterion.

53  
54  
55  
56  
57 We deleted this criterion.

1  
2  
3  
4  
5  
6 Also, in exclusion criteria 6 you mention “cognitive/behavioural” intervention. I am  
7 unclear why you included CBT (“cognitive”) here for pre-school children.

8 It does not mean CBT but “cognitive intervention (e.g. targeted for  
9 enhancing joint attention) or behavioural intervention”.

10  
11  
12  
13 Exclusion criterion 3 also needs to be defined carefully as stating that “study did not  
14 report adequately” can be open to selection bias. What are the important information  
15 that you need to have?

16 Since exclusion criterion 3 is included in exclusion criteria 9 (Studies  
17 judged to be in high risk of bias according to the Cochrane Collaboration  
18 tool for assessing risk of bias), we omitted exclusion criteria 3.

19  
20  
21  
22  
23 Exclusion criteria 5 will also be problematic – most families of most children in most  
24 trials try a number of different interventions whether they are in the experimental or  
25 control group over and above the comprehensive intervention that is being evaluated  
26 and we know the percentages of families of children with ASD trying alternative  
27 medicine at some point are very high. If you exclude all these studies/ families, then it is  
28 likely your sample size of studies may be small and possibly not representative of  
29 interventions for pre-school children with ASD. You may want to consider these issues  
30 and revise the criteria.

31 We meant this not exclusion for the studies in which the participants used  
32 alternative medicine, but exclusion for the studies whose main targets were  
33 alternative medicine. Most of the alternative and complementary medicine  
34 in autism has not been established their effectiveness evidence (Akins et al.,  
35 2010). We changed exclusion criterion 5 as below.

36 Alternative or complementary medicine was used as the main intervention of the study.

37 In addition, we changed exclusion criteria, “The control group received  
38 some early intervention for children with autism” to “The control group  
39 received some specific early intervention for children with autism and the  
40 study compared two interventions’ effectiveness.”

41  
42  
43  
44  
45  
46  
47  
48  
49  
50  
51  
52  
53  
54  
55  
56 Measures of treatment effect – Could you provide a reference for the statistical  
57  
58  
59  
60

1  
2  
3  
4  
5  
6 [analyses/ methods you are proposing for the readers \(i.e. for random effects model using](#)  
7 [a standardized mean difference\) as they are novel in this field?](#)  
8

9 We added a reference and revised this part as below.

10 Our review aims to make comparison across these different types of intervention study,  
11 thus we will standardize and synthesize the various categories of outcome measure  
12 using an inverse variance method in a random effect model (Higgins et al., 2008). We  
13 will compare the types of intervention model effectiveness for each outcome using a  
14 standardized mean difference.  
15  
16  
17

18  
19  
20 [Assessment of heterogeneity – if the meta-analysis includes such a small number of](#)  
21 [studies, I would argue that it would be more appropriate to revise the exclusion and](#)  
22 [inclusion criteria rather than set the p value to 0.10. Please see my comments above](#)  
23 [regarding some of the exclusion and inclusion criteria that I think will potentially be](#)  
24 [problematic and result in a very high exclusion of good quality published studies in the](#)  
25 [field. Please provide references for Chi2 test of consistency of results.](#)  
26  
27  
28

29 We added the references for random effects model using a standardized  
30 mean differences and Chi2 test of consistency of results as below. Since  
31 we will use random effect, not fixed effect, we will be able to synthesize  
32 data with heterogeneous. Thus, we delete the description about the p-value  
33 of Chi2 analyses.  
34  
35

36 Consistency of results will be assessed visually and by chi-square tests (Deeks et al.,  
37 2001). In addition, since chi-square can have low power when only few studies or  
38 studies of a small sample size are available, we will use the  $I^2$  statistic to calculate the  
39 degree to which heterogeneity is having an impact on the analysis (Higgins 2008).  
40  
41  
42

43  
44 [The same point goes for subgroup analyses, you need to have enough studies to be able](#)  
45 [to carry out these potentially very informative analyses.](#)  
46

47 Revised inclusion and exclusion criteria will extract enough studies to  
48 carry out the subgroup analyses. There is a trade off between quality and  
49 number here. Since we will use random effect models, we will be able to  
50 synthesize the effect sizes even if the sample size is small.  
51  
52  
53

54  
55 [P. 11 \(measures of treatment effect\) and p. 13 \(data synthesis\) are repetitive and exactly](#)  
56 [the same sentences are used in some parts.](#)  
57

58 We revised the section “measures of treatment effect” as below.  
59  
60

## Measures of treatment effect

### Continuous data

Continuous data will be analysed on the basis that the means and standard deviations are available and that there is no clear evidence of skew in the distribution.

Given the many challenges in trying to synthesize such complex literature, I would suggest that you consider including a section on “anticipated challenges and proposed course of action” so that the many difficulties discussed above can be openly and systematically addressed. One challenge I think is worth discussing in a little more detail includes how you will compare between findings from different studies with different time points (i.e. outcomes reported after 3, 6, 12, 24 months etc).

We mentioned the heterogeneity data as one of the challenges of this study in the discussion. Regarding the differences of the interventions’ duration, we think it one of the variables which this kind of synthesizing analyses must contain. Some interventions with short durations will be included in this study. We will think about the durations of the interventions in the systematic review. We added that in the discussion.

In more detail:

Anticipated challenges in synthesize the literature exist. The measures used for outcome are varied between studies and the standardized data will be heterogeneous. We do not assume that each study is estimating exactly the same quantity. Thus, we will use random effect models for the analyses (Higgins et al., 2008). In addition, the durations of the interventions will be different among the studies included in this study. We will synthesize the data regardless of the durations of the interventions, and will discuss the diversity of the durations in our paper.

Finally, you mention “parent-mediated” vs “child-mediated” intervention delivery – I think it is important to define and clarify what you mean as most comprehensive interventions target the child but also most emphasize training the parents and parents working as co-therapists.

We added the definitions of “parent-mediated” and “child-mediated” as below.

·Parent-mediated (directing parents to train their children, not training the children directly) vs. child-mediated (training the children directly) intervention delivery.



1  
2  
3  
4  
5  
6  
7  
8 **Responses to Dr. Sigmund Eldevik's comments:**

9 I think the study is set up appropriately. However, with the suggested inclusion criteria  
10 my guess you would not be able to find an adequate number of studies to include. I  
11 think such a study should be done, but I think you need to adjust inclusion criteria so  
12 that a meaningful number of studies could be included.  
13  
14

15 We revised our inclusion and exclusion criteria. We will be able to perform  
16 the analyses even if there are only several studies included into each model.  
17 Our revised criteria will compare each model on important outcome  
18 measures (or areas of measurement) that are common across studies.  
19  
20  
21  
22  
23

24 All correspondence should be sent to

25 Yoshiyuki Tachibana M.D., Ph.D.

26 Room 4.321, Psychiatry Research Group, 4th Floor (East), Jean McFarlane Building,  
27 University Place, University of Manchester and Manchester Academic Health Sciences  
28 Centre, Oxford Road, Manchester, M13 9PL, UK  
29  
30

31 Tel/Fax: +44 (0) 161 306 7941; E-mail: yoshiyuki-tatibana@hotmail.co.jp  
32  
33

34  
35 We are looking forward to your replies.  
36  
37

38 Sincerely yours,

39 Yoshiyuki Tachibana  
40  
41

42   
43  
44  
45  
46  
47  
48  
49  
50  
51  
52  
53  
54  
55  
56  
57  
58  
59  
60

1  
2  
3  
4  
5  
6  
7  
8  
9  
10  
11  
12  
13  
14  
15  
16  
17  
18  
19  
20  
21  
22  
23  
24  
25  
26  
27  
28  
29  
30  
31  
32  
33  
34  
35  
36  
37  
38  
39  
40  
41  
42  
43  
44  
45  
46  
47  
48  
49  
50  
51  
52  
53  
54  
55  
56  
57  
58  
59  
60

A systematic review with meta-analysis of comprehensive interventions for pre-school children with autism spectrum disorder: study protocol

Formatted: Font: 20 pt, No underline

~~A systematic review with meta-analysis of different models of intervention for pre-school autism: study protocol~~

Yoshiyuki Tachibana M.D., Ph.D.<sup>1,2</sup>, Jonathan Green M.D.<sup>1</sup>, Yeonhee Hwang Ph.D.<sup>3</sup>,  
Richard Emsley Ph.D.<sup>4</sup>

<sup>1</sup> Department of Child and Adolescent Psychiatry, University of Manchester and  
Manchester Academic Health Sciences Centre, UK

<sup>2</sup> Department of Applied Brain Science, Smart Aging International Research Center,  
IDAC, Tohoku University, Japan

<sup>3</sup> Special Support Education Research Center, Tohoku Fukushi University, Japan

<sup>4</sup> Health Methodology Research Group, Department of Biostatistics, University of  
Manchester and Manchester Academic Health Sciences Centre, UK

Correspondence to

Yoshiyuki Tachibana M.D., Ph.D.

Department of Child and Adolescent Psychiatry, University of Manchester and  
Manchester Academic Health Sciences Centre

Room 4.321, Psychiatry Research Group, 4<sup>th</sup> Floor (East), Jean McFarlane Building,  
University Place, University of Manchester and Manchester Academic Health Sciences  
Centre, Oxford Road, Manchester, M13 9PL, UK

Tel/Fax: +44 (0) 161 306 7941; E-mail: yoshiyuki-tatibana@hotmail.co.jp

Formatted: Left

1  
2  
3  
4  
5  
6  
7  
8  
9  
10  
11  
12  
13  
14  
15  
16  
17  
18  
19  
20  
21  
22  
23  
24  
25  
26  
27  
28  
29  
30  
31  
32  
33  
34  
35  
36  
37  
38  
39  
40  
41  
42  
43  
44  
45  
46  
47  
48  
49  
50  
51  
52  
53  
54  
55  
56  
57  
58  
59  
60

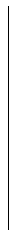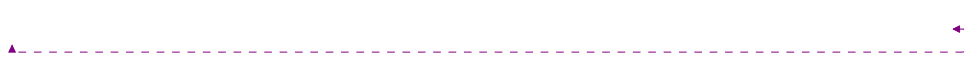

- Formatted: Font: (Asian) Japanese
- Formatted: Left, No widow/orphan control
- Formatted: Left

For peer review only

## ABSTRACT

**~~Aim~~Introduction:** The aims of our study are to: i) conduct a systematic review of the intervention literature in preschool autism spectrum disorder (ASD), including type of intervention that is tested and classification of outcome measures used; ii) to undertake a meta-analysis of the studies, allowing for the first time the comparison of different approaches to intervention using comparative outcomes.

Formatted: Font: (Asian) Japanese

**~~Background:~~** There are a number of alternative modalities of intervention for preschool ASD in use with different theoretical background and orientation, each of which tend to use different trial designs and outcome measures; ~~and there has been no comparative review to date across intervention modality in order to inform clinical decisions.~~ There is at this time an urgent need for comprehensive systematic review and meta-analyses of intervention studies for preschool ASD, covering studies of adequate quality across different intervention types and measurement methods, with a view to identifying the best current evidence for pre-school interventions in the disorder.

**~~Design and methods~~Methods and analysis:** We will perform a systematic review of RCTs for preschool children with ASD aged 0 to 6, along with a meta-analysis of qualifying studies across intervention modality. We will classify the interventions for preschool ASD under three models; behaviour, multi-modal developmental, and communication-focused. Firstly, we will perform a systematic review. Then, we will conduct a meta-analysis by comparing the three models with various outcomes using an inverse variance method in a random effect model. We will synthesize each outcome of the studies for the three models using standardized mean differences.

**~~Discussion~~Dissemination and ethics:** This study will identify each intervention's strengths and weaknesses. This study may also suggest what kinds of elements future intervention programmes for children with ASD should have. ~~This study may also~~

Formatted: English (U.K.)

1  
2  
3  
4  
5  
6  
7  
8  
9  
10  
11  
12  
13  
14  
15  
16  
17  
18  
19  
20  
21  
22  
23  
24  
25  
26  
27  
28  
29  
30  
31  
32  
33  
34  
35  
36  
37  
38  
39  
40  
41  
42  
43  
44  
45  
46  
47  
48  
49  
50  
51  
52  
53  
54  
55  
56  
57  
58  
59  
60

~~reveal what points are lacking among the current intervention programmes for children with ASD.~~ We strongly believe those findings will be able to translated into the clinical practices and patients and their family benefits.

**Trial registration:**

[http://www.crd.york.ac.uk/prospero/register\\_new\\_review.asp?RecordID=1349&UserID=230](http://www.crd.york.ac.uk/prospero/register_new_review.asp?RecordID=1349&UserID=230) (Registration No. CRD42011001349)

Formatted: Font: Font color: Auto

Formatted: Font: Bold

Formatted: Font: Not Bold

Formatted: Font: (Asian) Japanese

Formatted: Left

For peer review only

## INTRODUCTION

Recent epidemiological studies estimate a prevalence of 1:100 for autism spectrum disorder (ASD) <sup>1</sup>, which is a surprising increase over rates reported in the past <sup>2</sup>. There has been increasing interest in developing effective interventions for young children with ASD, since the evidence suggests that early intervention programmes are indeed beneficial for children with ASD, often improving developmental functioning and decreasing maladaptive behaviours and symptom severity <sup>3</sup>, and also can improve outcomes in later years for most individuals <sup>4</sup>.

An increasing volume of published trials of psychosocial intervention programmes for preschool ASD have been seen in recent years. These programmes tend to fall into three models; i) those based on behaviour change which use applied behavioural analysis (ABA); ii) those focused on therapies targeted at improving the social communication impairment, the core symptom of autism; iii) multimodal interventions targeted across areas of autistic children's development. In addition, an increasing number of these studies have followed CONSORT guidelines <sup>5</sup>, and some meta-analyses and systematic reviews about intervention programmes for preschool children have been published; e.g. <sup>6-8</sup>. These meta-analyses and systematic reviews focused exclusively on one or other of these groups of intervention styles; there has been no systematic review or meta-analysis of studies comparing results from different types of intervention approach from the viewpoint of the three models. For clinicians and commissioners this poses a difficulty in making general choices in a field containing often strong and partisan claims of effect from different traditions of intervention. Related to this, there has been great variation in endpoint measures used in these reported studies, making comparison of effects difficult. Specifically, there has been variation in whether endpoints have been framed in terms of autism symptom outcomes, non autism-specific outcomes, or intermediate developmental endpoints; and these latter two have often

1  
2  
3  
4  
5  
6  
7  
8  
9  
10  
11  
12  
13  
14  
15  
16  
17  
18  
19  
20  
21  
22  
23  
24  
25  
26  
27  
28  
29  
30  
31  
32  
33  
34  
35  
36  
37  
38  
39  
40  
41  
42  
43  
44  
45  
46  
47  
48  
49  
50  
51  
52  
53  
54  
55  
56  
57  
58  
59  
60

been reported as if they were surrogate endpoints for autism-specific symptoms or disorder. We think that these considerations indicate the need for a more comprehensive review of intervention studies for preschool ASD, covering studies of adequate quality across different intervention types and measurement methods, with a view to identifying the best current evidence for preschool interventions in the disorder. In this study, we will investigate it by comparing three major types of interventions with various outcomes.

We will undertake a systematic review and a meta-analysis of RCTs for preschool children with ASD. Recently many RCTs for children with ASD have been emerged as sufficient as to perform meta-analyses. RCT methodology has been identified as the gold standard in efficacy research<sup>9</sup>. In addition, meta-analyses of RCTs is the top hierarchy of evidence based medicine<sup>10</sup>. Thus, the findings of this study will be very strong evidence about interventions for children with ASD. Howlin et al. are asserting that there are three main strands of early interventions for children with ASD): programs with a particular emphasis on the use of behavioural principle to improve learning and behaviour; those that have a specific focus on communication; and those in which developmental/educational strategies have been employed<sup>11</sup>. In this study, we named those strands as behavioural, communication-focused, and multimodal developmental interventions, respectively. We classify the interventions for preschool children with ASD under the three models; i.e. behaviour model, developmental model, and communication focused model. Understanding the mechanisms that underlie this attenuation of treatment effects and how these can be overcome is one current challenge<sup>12</sup>. This study may reveal each type of the intervention's strong and weak points. This study will reveal which type of interventions is the most effective to various kinds of treatment factors respectively. Its findings will guide us to develop new types of interventions to overcome the attenuation of treatment effects in the core symptoms of

Formatted: Font: Times New Roman

Formatted: HTML Preformatted, Justified,  
First line: 1 ch, Space Before: 0 pt, After: 0

Formatted: Font: Times New Roman

1  
2  
3  
4  
5  
6  
7  
8  
9  
10  
11  
12  
13  
14  
15  
16  
17  
18  
19  
20  
21  
22  
23  
24  
25  
26  
27  
28  
29  
30  
31  
32  
33  
34  
35  
36  
37  
38  
39  
40  
41  
42  
43  
44  
45  
46  
47  
48  
49  
50  
51  
52  
53  
54  
55  
56  
57  
58  
59  
60

autism. It will contribute to the appropriate choices of the interventions for children with ASD for their families, clinicians, and the policymakers.

Formatted: Font: (Default) Times New Roman, Font color: Black

The objective of our study is to: i) conduct a systematic review of all the preschool intervention literature in ASD, including the type of intervention that is being tested and classification of outcome measures used; ii) to undertake a meta-analysis of methodologically adequate studies using the Cochrane tool, which will allow for the first time comparison of different approaches to intervention on comparative outcome measures.

## METHODS

### Types of studies

We will include randomized controlled trials and subject these to a rating on quality criteria.

### Types of participants

Participants comprise preschool children aged 0 to 6 with a diagnosis of ASD as below.

Formatted: No underline

Formatted: No underline

Diagnostic and statistical Manual of Mental Disorders-IV-Text Revision (DSM-IV-TR)

<sup>13</sup>

Formatted: No underline

▪ Autistic disorder

▪ Asperger disorder

▪ Pervasive developmental disorder not otherwise specified (PDD-NOS)

International Classification of Diseases-10 (ICD-10)<sup>14</sup>

Formatted: No underline

Formatted: No underline

Formatted: No underline

▪ Childhood autism

▪ Asperger syndrome, atypical autism

▪ Other pervasive developmental disorders



1  
2  
3  
4  
5  
6  
7  
8  
9  
10  
11  
12  
13  
14  
15  
16  
17  
18  
19  
20  
21  
22  
23  
24  
25  
26  
27  
28  
29  
30  
31  
32  
33  
34  
35  
36  
37  
38  
39  
40  
41  
42  
43  
44  
45  
46  
47  
48  
49  
50  
51  
52  
53  
54  
55  
56  
57  
58  
59  
60

- Pervasive developmental disorders, unspecified.

~~Participants comprise preschool children with a diagnosis of autism spectrum disorder (ASD) aged 0 to 6.~~

### Types of interventions

We classify interventions for preschool ASD in three groups; i) behavioural interventions – based essentially on learning theory and on applied behaviour analysis; ii) communication-focused interventions, targeting social communication impairment, as the core symptom of autism; iii) multimodal developmental interventions targeting a range of aspects of children’s development.

### Types of outcome measures

A feature of this review is that we will systematically classify the various outcome measures used within recent intervention trials into the following categories:

#### *Primary outcomes*

Autism behavioural symptoms: qualitative impairment in social interaction; qualitative impairment in communication; restricted repetitive and stereotyped patterns of behaviour, interests, and activities. These are the triad of diagnostic criteria for autism in DSM-IV-TR and the definitional symptoms of the disorder and key indicators of psychopathology (e.g. the autism Diagnostic Observation Schedule-<sup>15</sup> will be used for these outcomes.)–

#### *Secondary outcomes*

Non-specific developmental outcomes. These are not directly related by definition to autism diagnosis but are used in some studies as substitute outcomes – examples are IQ

Formatted: No underline

Formatted: No underline

and cognitive development (e.g. the Wechsler Preschool and Primary Scale of Intelligence third edition<sup>16</sup>, will be used for these outcomes.):

Intermediate outcomes relevant to the known development of autism – which might be candidates for surrogate endpoints. These outcomes are often defined as the proximal targets of intervention approaches from a developmental perspective. Examples (along with appropriate measures) are: measures of adaptive behavior (the Vineland Adaptive Behavior Scale<sup>17</sup>), joint attention (the Early Social Communication Scales<sup>18</sup>), imitation ability (the Imitation Battery<sup>19</sup>), symbolic play (the Communication and Symbolic Behavior Scales Developmental Profile<sup>20</sup>), parent-child interaction (the Dyadic Communication Measure for Autism<sup>21</sup>), receptive language (the MacArthur-Bates Communicative Development Inventory (MCDI<sup>22</sup>)), expressive language (MCDI<sup>22</sup>).

~~Intermediate outcomes relevant to the known development of autism – which might be candidates for surrogate endpoints. These outcomes are often defined as the proximal targets of intervention approaches from a developmental perspective. Examples are: measures of joint attention, parent-child interaction, imitation ability, symbolic play, social communication in an interactive setting, receptive language, expressive language.~~

### Electronic searches

We will do a systematic review of the published work according to the PRISMA statement<sup>23</sup>. Relevant studies will be identified by searching the following data sources: PsycINFO (from 1956 to January, 2011), Medline via Ovid (from 1950 to January, 2011), ERIC (from 1950 to January, 2011) and the Cochrane database.

We will use the following search terms to search all trials registers and databases: “autism”, “autism spectrum disorder”, “ASD”, “high function autism”, “high function ASD”, “Asperger syndrome”, “pervasive developmental disorder”, “PDDNOS”,

Formatted: No underline

1  
2  
3  
4  
5  
6  
7  
8  
9  
10  
11  
12  
13  
14  
15  
16  
17  
18  
19  
20  
21  
22  
23  
24  
25  
26  
27  
28  
29  
30  
31  
32  
33  
34  
35  
36  
37  
38  
39  
40  
41  
42  
43  
44  
45  
46  
47  
48  
49  
50  
51  
52  
53  
54  
55  
56  
57  
58  
59  
60

“intervention”, “treatment”, “therapy”, “communication”, “interpersonal”, “speech”, “interaction”, “synchrony”, “relationship”, “language”, “social” and “development”, “behavior\_therapy”, “intensive behavioral intervention”. Their search will be limited by age group from 0 to 6 years old and “randomized controlled trial.” This search strategy has been peer-reviewed by a librarian of University of Manchester.

### Validity assessment

Two of the authors, Y.T., Y.H. independently will review abstracts of potentially the relevant studies. This will be followed by a consensus discussion with J.G. The quality of the RCTs will be coded independently by Y.T. and Y.H. and disagreement will be resolved by consensus discussions.

### Searching other resources

Reference lists from identified trials and review articles will be manually scanned to identify any other relevant studies. The clinicalTrials.gov and the Cochrane Library website will be also searched for randomized trials that were registered as completed but not yet published.

### Data collection and analysis

#### *Selection of studies*

#### *Inclusion:*

1. Participants comprise preschool children with a diagnosis of ASD or pervasive developmental disorder (PDD).
2. Randomized controlled trials

3. Interventions delivered to the parents/guardians and/or directly to the child, by special educators, teachers, speech pathologists, psychologists, or other allied health professional students will be included.

4. Studies carried out while the children were at a preschool age between 0 and 6 years.

~~5. The control group will be those who did not received early intervention for autism.~~

~~6. Studies judged to be in low risk of bias according to the Cochrane Collaboration tool for assessing risk of bias~~

*Exclusion:*

1. The study was not primary research on preschool autism.

2. The study did not assess a cognitive/behavioural intervention for preschool autism.

~~3. The study did not report adequately on any measurable data for health related outcomes relevant to the review.~~

~~34. The study design was not a randomized controlled trial.~~

~~45. The intervention used alternative medicine. Alternative or complementary medicine was used as the main intervention of the study.~~

~~56. The intervention was pharmacological one.~~

~~67. The intervention was not classified into behavioural, multimodal developmental or communication-focused model.~~

~~78. The control group received a specific early intervention programme for children with autism which was not a usual treatment provided by their local services. ~~some early intervention for children with autism.~~~~

~~89. Studies judged to be in high risk of bias according to the Cochrane Collaboration tool for assessing risk of bias~~

All citations sourced from the search strategy will be transferred to EndNote, a reference management database software. Initial screening of titles and abstracts by an

Formatted: Font: (Asian) Japanese

1  
2  
3  
4  
5  
6  
7  
8  
9 experienced research fellow (YT) will eliminate all those citations obviously irrelevant  
10 to the topic, for example, prevalence studies, studies not relating to autism spectrum  
11 disorders, single case studies. Thereafter, two review authors (YT and YH) will assess  
12 and select studies for inclusion from the group of superficially relevant studies. In the  
13 event of a disagreement, resolution will be reached in discussion with the third author  
14 (JG), if necessary following inspection of the full paper.  
15  
16  
17  
18  
19

### 20 21 **Data extraction and management**

22  
23 YT and YH will independently extract data from selected trials using a specially  
24 designed data extraction form. Extracted data will consist of methods (dose and  
25 frequency of intervention); diagnostic description of participants, and type of  
26 intervention, including target, intensity, duration and method of application (parent-  
27 mediated, therapist, school-based etc.). Data will be extracted independently by two  
28 review authors (YT and YH) and disagreements will be resolved by negotiation with a  
29 third author (JG).  
30  
31  
32  
33  
34  
35  
36  
37

### 38 **Assessment of risk of bias in the studies**

39  
40 Risk of bias will be assessed by two independent review authors (YT and YH) and  
41 disagreements will be resolved by negotiation with a third review author (JG). We will  
42 use the Cochrane Collaboration tool for assessing risk of bias in these areas<sup>24</sup>. The  
43 assessed risk of bias in studies will include in the following domains: sequence  
44 generation; allocation concealment; blinding; incomplete outcome data; selective  
45 outcome reporting; other sources of bias. The process will involve recording the  
46 appropriate information for each study (for example describing the method used to  
47 conceal allocation in detail) and evaluating whether there is risk of bias in that area (for  
48  
49  
50  
51  
52  
53  
54  
55  
56  
57  
58  
59  
60

1  
2  
3  
4  
5  
6  
7  
8  
9  
10  
11  
12  
13  
14  
15  
16  
17  
18  
19  
20  
21  
22  
23  
24  
25  
26  
27  
28  
29  
30  
31  
32  
33  
34  
35  
36  
37  
38  
39  
40  
41  
42  
43  
44  
45  
46  
47  
48  
49  
50  
51  
52  
53  
54  
55  
56  
57  
58  
59  
60

example, was allocation adequately concealed). We will allocate studies to the three categories according to our judgment of each area or potential risk of bias: A. Low risk of bias; B. Moderate (or unclear) risk of bias; C. High risk of bias. Whether the studies should be included for the analyses or not will be judged individually based on the results of the risk of bias assessments.

### Measures of treatment effect

#### Continuous data

Continuous data will be analysed on the basis that the means and standard deviations are available and that there is no clear evidence of skew in the distribution.

#### ~~Measures of treatment effect~~

~~The categories of outcome measure differ conceptually in important ways, and have been used in a systematic different way across trials of the different intervention types identified above. Our review aims for the first time to make comparison across these different types of intervention study, thus we will standardize and synthesize the various categories of outcome measure using an inverse variance method. The measures used for outcome are varied between studies and the standardized data will be heterogeneous. We will use a random effects model for the analyses, comparing type of intervention model effectiveness for each outcome using a standardized mean difference. This is a novel approach for this field.~~

### **Dealing with missing data**

Missing data will be assessed for each individual study. Where a loss of significant quantities of participant data is reported such that the review authors agree that the conclusions of the study are compromised, trial authors will be contacted. If no reply is

1  
2  
3  
4  
5  
6  
7  
8  
9 forthcoming or full data are not made available, these studies will not be included in the  
10 final analysis. For included studies reporting drop-out, we will report the number of  
11 participants included in the final analysis as a proportion of those participants who  
12 began the intervention. Reasons for missing data will be reported. The extent to which  
13 the results of the review could be altered by the missing data will be assessed and  
14 discussed. If summary data are missing, trial authors will be contacted. If no reply is  
15 forthcoming or the required summaries are not made available, the authors will include  
16 the study in the review and assess and discuss the extent to which its absence from  
17 meta-analysis affects the review results.  
18  
19  
20  
21  
22  
23  
24

#### 25 26 27 **Assessment of heterogeneity**

28  
29 Consistency of results will be assessed visually and by chi-square tests<sup>25</sup>. In addition,  
30 since chi-square can have low power when only few studies or studies of a small sample  
31 size are available<sup>26</sup>, we will use the I<sup>2</sup> statistic to calculate the degree to which  
32 heterogeneity is having an impact on the analysis<sup>27</sup>.  
33  
34  
35  
36

37  
38 ~~Consistency of results will be assessed visually and by a Chi2 test. If the meta analysis~~  
39 ~~includes only a small number of studies, or where studies have small sample sizes, a P~~  
40 ~~value of 0.10 will be applied for statistical significance. In addition, since Chi2 can have~~  
41 ~~low power when only few studies or studies of a small sample size are available, we~~  
42 ~~will use the I2 statistic to calculate the degree to which heterogeneity is having an~~  
43 ~~impact on the analysis (Higgins 2008).~~  
44  
45  
46  
47  
48

#### 49 50 51 **Assessment of reporting biases**

1  
2  
3  
4  
5  
6  
7  
8  
9 If sufficient studies are found, funnel plots will be drawn to investigate any relationship  
10 between effect size and sample size. Such a relationship could be due to publication or  
11 related biases, or due to systematic differences between small and large studies. If a  
12 relationship is identified, clinical diversity of the studies will be further examined as a  
13 possible explanation. Every attempt will be made to obtain unpublished data and data  
14 from conference proceedings.  
15  
16  
17  
18  
19

### 20 21 **Data synthesis**

22  
23 Data synthesis will be performed using Review Manager version 5.1 (Cochrane  
24 Collaboration software). We will assess continuous and binary data. Assuming that two  
25 or more studies that are suitable for inclusion are found, and that the studies are  
26 considered to be homogenous, a meta-analysis will be performed on the results. The  
27 categories of outcome measure mentioned above differ conceptually in important ways,  
28 and have been used in a systematic different way across trials of the different  
29 intervention types identified above. Our review aims to make comparison across these  
30 different types of intervention study, thus we will standardize and synthesize the various  
31 categories of outcome measure using an inverse variance method in a random effect  
32 model<sup>27</sup>. ~~The measures used for outcome are varied between studies and the~~  
33 ~~standardized data will be heterogeneous. We will use a random effects model for the~~  
34 ~~analyses<sup>27</sup>, since we do not assume that each study is estimating exactly the same~~  
35 ~~quantity.~~ We will compare the types of intervention model effectiveness for each  
36 outcome using a standardized mean difference.  
37  
38  
39  
40  
41  
42  
43  
44  
45  
46  
47  
48  
49

### 50 **Subgroup analysis and investigation of heterogeneity**



1  
2  
3  
4  
5  
6  
7  
8  
9 We will undertake subgroup analyses and meta-regression and where no significant  
10 heterogeneity of effect sizes is found, these will be pooled to calculate a final effect size.  
11 While these analyses may enable us to hypothesize as to possible causes of differences  
12 between studies' findings, some heterogeneity is likely to remain, and any statistical  
13 analysis will be accompanied by a narrative synthesis.  
14  
15

16  
17 Subgroup analysis will be undertaken if clinically different interventions are  
18 identified, or there are clinically relevant differences between participant groups.  
19

20 Anticipated clinically relevant differences are:  
21

- 22 1. intervention delivery type (e.g. therapist, parent-mediated, school-based) and length
- 23 2. intervention target skill (e.g. Theory of Mind as a whole, joint attention, emotion
- 24 recognition, false belief understanding)
- 25 3. participant age (e.g. preschool, young children, adolescents, adults), IQ (low versus
- 26 normal or high), specific diagnosis and verbal ability.  
27

28 Relevant subgroup analyses will also include:  
29

- 30 ·Severity of autism at baseline. This is a crucial element in evaluating autism studies.
- 31 ·Social economic status SES and other demographic variables. Sampling bias and  
32 external validity of studies is an important consideration.
- 33 ·Age of child
- 34 ·Type of intervention (our 3 groups as above)
- 35 ·Parent-mediated (directing parents to train their children, not training the children  
36 directly) vs. child-mediated (training the children directly) intervention delivery. ~~A key~~  
37 ~~distinguishing point between different studies in the area.~~
- 38 ·Cognitive ability at baseline
- 39
- 40
- 41
- 42
- 43
- 44
- 45
- 46
- 47
- 48
- 49
- 50
- 51
- 52
- 53
- 54
- 55
- 56
- 57
- 58
- 59
- 60

### Sensitivity analysis

1  
2  
3  
4  
5  
6  
7  
8  
9 Sensitivity analysis will be conducted to assess the impact of study quality on the results  
10 of the meta-analyses. For example, we will test to see if studies with high rates of loss to  
11 follow up or inadequate blinding are more likely to show positive outcomes and also to  
12 assess the impact of imputing missing data.  
13  
14

## 15 16 17 18 DISCUSSION

19 We believe that the findings of this systematic review and meta-analysis will have  
20 important implications for both clinical practice and research. Meta-analysis of  
21 randomized controlled trialRCTs of the interventions for preschool children with ASD  
22 will provide the most reliable basis for the decisions of early interventions for them.  
23 Analyses as to the three representative models: behavioural, multimodal developmental  
24 or communication-focused models will guide future clinical practice and research trials  
25 for children with ASD. This study will provide information about which kind of  
26 intervention has strength points and weak points, and what are those strength points and  
27 weak points are. This study may also suggest what kinds of elements future intervention  
28 programmes for children with ASD should have. This study may also reveal what points  
29 are lacking among the current intervention programmes for children with ASD. We  
30 strongly believe those findings will be able to translated into the clinical practices and  
31 patients and their family benefits. Anticipated challenges in synthesize the literature  
32 exist. The measures used for outcome are varied between studies and the standardized  
33 data will be heterogeneous. We do not assume that each study is estimating exactly the  
34 same quantity. Thus, we will use random effect models for the analyses<sup>27</sup>. In addition,  
35 the durations of the interventions will be different among the studies included in this  
36 study. We will synthesize the data regardless of the durations of the interventions, and  
37 will discuss the diversity of the durations in our paper.  
38  
39  
40  
41  
42  
43  
44  
45  
46  
47  
48  
49  
50  
51  
52  
53  
54

Formatted: Font: Times New Roman

Formatted: Font: Times New Roman

Formatted: Font: Times New Roman

Formatted: Font: Font color: Auto, (Asian)  
Japanese

**Authors' contribution** YT and JG contributed to draft the protocol and develop a search strategy. YT also drafted this manuscript. RE contributed to provide statistical advice for the design and the analysis. All authors read and approved the final manuscript.

**Acknowledgement** We thank Claire Hodkinson for peer-reviewing the search strategy of this study.

**Competing interests** None.

**Funding** This study was supported by 'Tohoku University Young Scientist Dispatch Program'.

## References

1. Baird G, Simonoff E, Pickles A, Chandler S, Loucas T, Meldrum D, et al. Prevalence

of disorders of the autism spectrum in a population cohort of children in South

Thames: the Special Needs and Autism Project (SNAP). *The Lancet*.

2006;368(9531):210-15.

2. Newschaffer CJ, Croen LA, Daniels J, Giarelli E, Grether JK, Levy SE, et al. The

epidemiology of autism spectrum disorders\*. *Annu. Rev. Public Health*.

2007;28:235-58.

3. Rogers SJ, Vismara LA. Evidence-based comprehensive treatments for early autism.

*Journal of clinical child and adolescent psychology: the official journal for the*

*Society of Clinical Child and Adolescent Psychology, American Psychological*

*Association, Division 53*, 2008;37(1):8.

4. Office USGA, Rights USCHCoGRSoH, Wellness. *Special education: children with*

*autism: report to the Chairman and Ranking Minority Member, Subcommittee on*

*Human Rights and Wellness, Committee on Government Reform, House of*

**Formatted:** Do not check spelling or grammar

**Formatted:** Font: Italic, Do not check spelling or grammar

**Formatted:** Do not check spelling or grammar

**Formatted:** Font: Italic, Do not check spelling or grammar

**Formatted:** Do not check spelling or grammar

**Formatted:** Font: Italic, Do not check spelling or grammar

**Formatted:** Do not check spelling or grammar

**Formatted:** Font: Italic, Do not check spelling or grammar

Representatives; DIANE Publishing, 2005.

**Formatted:** Do not check spelling or grammar

5. Campbell MK, Elbourne DR, Altman DG. CONSORT statement: extension to cluster randomised trials. *Bmj* 2004;328(7441):702.

**Formatted:** Font: Italic, Do not check spelling or grammar

**Formatted:** Do not check spelling or grammar

6. Eldevik S, Hastings RP, Hughes JC, Jahr E, Eikeseth S, Cross S. Meta-analysis of early intensive behavioral intervention for children with Autism. *Journal of Clinical Child and Adolescent Psychology* 2009;38(3):12.

**Formatted:** Font: Italic, Do not check spelling or grammar

**Formatted:** Do not check spelling or grammar

7. Spreckley M, Boyd R. Efficacy of applied behavioral intervention in preschool children with autism for improving cognitive, language, and adaptive behavior: a systematic review and meta-analysis. *The Journal of pediatrics* 2009;154(3):338-44.

**Formatted:** Font: Italic, Do not check spelling or grammar

**Formatted:** Do not check spelling or grammar

8. Makrygianni MK, Reed P. A meta-analytic review of the effectiveness of behavioural early intervention programs for children with autistic spectrum disorders. *Research in Autism Spectrum Disorders* 2010;4(4):577-93.

**Formatted:** Font: Italic, Do not check spelling or grammar

**Formatted:** Do not check spelling or grammar

9. Smith T, Scahill L, Dawson G, Guthrie D, Lord C, Odom S, et al. Designing research studies on psychosocial interventions in autism. *Journal of autism and developmental Disorders* 2007;37(2):354-66.

**Formatted:** Font: Italic, Do not check spelling or grammar

**Formatted:** Do not check spelling or grammar

10. Summerskill WSM. Hierarchy of evidence. *Key Topics in Evidence Based Medicine*. Oxford: Bios Scientific Publishers, 2001.

**Formatted:** Font: Italic, Do not check spelling or grammar

**Formatted:** Do not check spelling or grammar

11. Howlin P, Magiati I, Charman T. Systematic review of early intensive behavioral interventions for children with autism. *Journal Information* 2009;114(1).

**Formatted:** Font: Italic, Do not check spelling or grammar

**Formatted:** Do not check spelling or grammar

12. Charman T. Commentary: Glass half full or half empty? Testing social communication interventions for young children with autism-reflections on Landa, Holman, O'Neil, and Stuart (2011). *Journal of Child Psychology and Psychiatry* 2011;52(1):22-23.

**Formatted:** Font: Italic, Do not check spelling or grammar

**Formatted:** Do not check spelling or grammar

13. Association AP, DSM-IV. APATFo. *Diagnostic and statistical manual of mental disorders: DSM-IV-TR*; American Psychiatric Publishing, Inc., 2000.

**Formatted:** Font: Italic, Do not check spelling or grammar

**Formatted:** Do not check spelling or grammar

1  
2  
3  
4  
5  
6  
7  
8  
9  
10  
11  
12  
13  
14  
15  
16  
17  
18  
19  
20  
21  
22  
23  
24  
25  
26  
27  
28  
29  
30  
31  
32  
33  
34  
35  
36  
37  
38  
39  
40  
41  
42  
43  
44  
45  
46  
47  
48  
49  
50  
51  
52  
53  
54  
55  
56  
57  
58  
59  
60

14. Organization WH. *The ICD-10 classification of mental and behavioural disorders:*

*diagnostic criteria for research*; World Health Organization, 1993.

**Formatted:** Font: Italic, Do not check spelling or grammar

**Formatted:** Do not check spelling or grammar

15. Lord C, Risi S, Lambrecht L, Cook EH, Leventhal BL, DiLamore PC, et al. The

*Autism Diagnostic Observation Schedule—Generic: A standard measure of social and communication deficits associated with the spectrum of autism.*

*Journal of autism and developmental Disorders*, 2000;30(3):205-23.

**Formatted:** Font: Italic, Do not check spelling or grammar

**Formatted:** Do not check spelling or grammar

16. Wechsler D. *Wechsler Preschool and Primary Scale of intelligence third edition*;

San Antonio, TX: Harcourt Assessment, Inc, 2002.

**Formatted:** Font: Italic, Do not check spelling or grammar

**Formatted:** Do not check spelling or grammar

17. Sparrow SS, Cicchetti DV. *The Vineland Adaptive Behavior Scales*; Allyn & Bacon,

1989.

**Formatted:** Font: Italic, Do not check spelling or grammar

**Formatted:** Do not check spelling or grammar

18. Mundy P, Delgado C, Block J, Venezia M, Hogan A, Seibert J. Early Social

Communication Scales (ESCS). *Coral Gables, FL: University of Miami*, 2003.

**Formatted:** Font: Italic, Do not check spelling or grammar

**Formatted:** Do not check spelling or grammar

19. Rogers SJ, Hepburn SL, Stackhouse T, Wehner E. Imitation performance in toddlers

with autism and those with other developmental disorders. *Journal of Child*

*Psychology and Psychiatry*, 2003;44(5):763-81.

**Formatted:** Font: Italic, Do not check spelling or grammar

**Formatted:** Do not check spelling or grammar

20. Wetherby AM, Prizant BM. *Communication and Symbolic Behavior Scales*;

*Developmental Profile*; Paul H Brookes Publishing, 2002.

**Formatted:** Font: Italic, Do not check spelling or grammar

**Formatted:** Do not check spelling or grammar

21. Aldred C, Green J, Adams C. A new social communication intervention for children

with autism: pilot randomised controlled treatment study suggesting

effectiveness. *Journal of Child Psychology and Psychiatry*, 2004;45(8):1420-30.

**Formatted:** Font: Italic, Do not check spelling or grammar

**Formatted:** Do not check spelling or grammar

22. Fenson L, Marchman VA, Thal D. The MacArthur-Bates Communicative

Development Inventories User's Guide and Technical Manual 2006.

**Formatted:** Do not check spelling or grammar

23. Moher D, Liberati A, Tetzlaff J, Altman DG. Preferred reporting items for systematic

reviews and meta-analyses: the PRISMA statement. *PLoS Medicine*,

2009;6(7):e1000097.

**Formatted:** Font: Italic, Do not check spelling or grammar

**Formatted:** Do not check spelling or grammar

24. Higgins J, Green S. *Cochrane Handbook for Systematic Reviews of Interventions*

Version 5.1.0 [updated March 2011]. *The Cochrane Collaboration*, 2011.

**Formatted:** Font: Italic, Do not check spelling or grammar

25. Deeks JJ, Altman DG, Bradburn MJ. Statistical Methods for Examining Heterogeneity and Combining Results from Several Studies in Meta-Analysis. *Systematic reviews in health care*, 2001:285-312.

**Formatted:** Do not check spelling or grammar

**Formatted:** Font: Italic, Do not check spelling or grammar

26. Higgins J, Thompson SG, Deeks JJ, Altman DG. Measuring inconsistency in meta-analyses. *Bmj*, 2003;327(7414):557.

**Formatted:** Do not check spelling or grammar

**Formatted:** Font: Italic, Do not check spelling or grammar

27. Higgins DJPT, Green S. *Cochrane handbook for systematic reviews of interventions*; Wiley Online Library, 2008.

**Formatted:** Do not check spelling or grammar

**Formatted:** Font: Italic, Do not check spelling or grammar

**Formatted:** Do not check spelling or grammar

1. Baird G, Simonoff E, Pickles A, Chandler S, Loucas T, Meldrum D, et al. Prevalence of disorders of the autism spectrum in a population cohort of children in South Thames: the Special Needs and Autism Project (SNAP). *The Lancet* 2006;368(9531):210-15.

2. Newschaffer CJ, Croen LA, Daniels J, Giarelli E, Grother JK, Levy SE, et al. The epidemiology of autism spectrum disorders\*. *Annu. Rev. Public Health* 2007;28:235-58.

3. Rogers SJ, Vismara LA. Evidence-based comprehensive treatments for early autism. *Journal of clinical child and adolescent psychology: the official journal for the Society of Clinical Child and Adolescent Psychology, American Psychological Association, Division 53* 2008;37(1):8.

4. Office USGA, Rights USCHCoGRSoH, Wellness. *Special education: children with autism: report to the Chairman and Ranking Minority Member, Subcommittee on Human Rights and Wellness, Committee on Government Reform, House of Representatives*: DIANE Publishing, 2005.

5. Campbell MK, Elbourne DR, Altman DG. CONSORT statement: extension to cluster randomised trials. *Bmj* 2004;328(7441):702.

6. Eldevik S, Hastings RP, Hughes JC, Jahr E, Eikeseth S, Cross S. Meta-analysis of early intensive behavioral intervention for children with Autism. *Journal of Clinical Child and Adolescent Psychology* 2009;38(3):12.
7. Spreckley M, Boyd R. Efficacy of applied behavioral intervention in preschool children with autism for improving cognitive, language, and adaptive behavior: a systematic review and meta analysis. *The Journal of pediatrics* 2009;154(3):338-44.
8. Makrygianni MK, Reed P. A meta-analytic review of the effectiveness of behavioural early intervention programs for children with autistic spectrum disorders. *Research in Autism Spectrum Disorders* 2010;4(4):577-93.
9. Smith T, Seahill L, Dawson G, Guthrie D, Lord C, Odom S, et al. Designing research studies on psychosocial interventions in autism. *Journal of autism and developmental Disorders* 2007;37(2):354-66.
10. Summerskill WSM. Hierarchy of evidence. *Key Topics in Evidence Based Medicine: Oxford: Bios Scientific Publishers* 2001.
11. Howlin P, Magiati I, Charman T. Systematic review of early intensive behavioral interventions for children with autism. *Journal Information* 2009;114(1).
12. Charman T. Commentary: Glass half full or half empty? Testing social communication interventions for young children with autism-reflections on Landa, Holman, O'Neill, and Stuart (2011). *Journal of Child Psychology and Psychiatry* 2011;52(1):22-23.
13. Association AP, DSM IV. APATFo. *Diagnostic and statistical manual of mental disorders: DSM IV TR: American Psychiatric Publishing, Inc., 2000.*
14. Organization WH. *The ICD-10 classification of mental and behavioural disorders: diagnostic criteria for research: World Health Organization, 1993.*
15. Lord C, Risi S, Lambrecht L, Cook EH, Leventhal BL, DiLavore PC, et al. The

- 1  
2  
3  
4  
5  
6  
7  
8  
9  
10  
11  
12  
13  
14  
15  
16  
17  
18  
19  
20  
21  
22  
23  
24  
25  
26  
27  
28  
29  
30  
31  
32  
33  
34  
35  
36  
37  
38  
39  
40  
41  
42  
43  
44  
45  
46  
47  
48  
49  
50  
51  
52  
53  
54  
55  
56  
57  
58  
59  
60
- Autism Diagnostic Observation Schedule—Generic: A standard measure of social and communication deficits associated with the spectrum of autism. *Journal of autism and developmental Disorders* 2000;30(3):205–23.
16. Wechsler D. *Wechsler Preschool and Primary Scale of intelligence third edition*: San Antonio, TX: Harcourt Assessment, Inc, 2002.
17. Sparrow SS, Cicchetti DV. *The Vineland Adaptive Behavior Scales*: Allyn & Bacon, 1989.
18. Mundy P, Delgado C, Block J, Venezia M, Hogan A, Seibert J. Early Social Communication Scales (ESCS). *Coral Gables, FL: University of Miami* 2003.
19. Rogers SJ, Hepburn SL, Staekhouse T, Wehner E. Imitation performance in toddlers with autism and those with other developmental disorders. *Journal of Child Psychology and Psychiatry* 2003;44(5):763–81.
20. Wetherby AM, Prizant BM. *Communication and Symbolic Behavior Scales: Developmental Profile*: Paul H Brookes Publishing, 2002.
21. Aldred C, Green J, Adams C. A new social communication intervention for children with autism: pilot randomised controlled treatment study suggesting effectiveness. *Journal of Child Psychology and Psychiatry* 2004;45(8):1420–30.
22. Fenson L, Marchman VA, Thal D. *The MacArthur Bates Communicative Development Inventories User's Guide and Technical Manual* 2006.
23. Moher D, Liberati A, Tetzlaff J, Altman DG. Preferred reporting items for systematic reviews and meta-analyses: the PRISMA statement. *PLoS Medicine* 2009;6(7):e1000097.
24. Higgins J, Green S. *Cochrane Handbook for Systematic Reviews of Interventions Version 5.1.0 [updated March 2011]*. *The Cochrane Collaboration* 2011.
25. Deeks JJ, Altman DG, Bradburn MJ. *Statistical Methods for Examining Heterogeneity and Combining Results from Several Studies in Meta-Analysis*.



1  
2  
3  
4  
5  
6  
7  
8  
9  
10  
11  
12  
13  
14  
15  
16  
17  
18  
19  
20  
21  
22  
23  
24  
25  
26  
27  
28  
29  
30  
31  
32  
33  
34  
35  
36  
37  
38  
39  
40  
41  
42  
43  
44  
45  
46  
47  
48  
49  
50  
51  
52  
53  
54  
55  
56  
57  
58  
59  
60

*Systematic reviews in health care* 2001:285-312.

26. Higgins J, Thompson SG, Deeks JJ, Altman DG. Measuring inconsistency in meta-analyses. *Bmj* 2003;327(7414):557.

27. Higgins DJPT, Green S. *Cochrane handbook for systematic reviews of interventions*: Wiley Online Library, 2008.

For peer review only



**A systematic review with meta-analysis of comprehensive interventions for preschool children with autism spectrum disorder: study protocol**

|                                 |                                                                                                                                                                                                                                                                                                                                                                                                                                                                                                                                                                                                                                                       |
|---------------------------------|-------------------------------------------------------------------------------------------------------------------------------------------------------------------------------------------------------------------------------------------------------------------------------------------------------------------------------------------------------------------------------------------------------------------------------------------------------------------------------------------------------------------------------------------------------------------------------------------------------------------------------------------------------|
| Journal:                        | <i>BMJ Open</i>                                                                                                                                                                                                                                                                                                                                                                                                                                                                                                                                                                                                                                       |
| Manuscript ID:                  | bmjopen-2011-000679.R2                                                                                                                                                                                                                                                                                                                                                                                                                                                                                                                                                                                                                                |
| Article Type:                   | Protocol                                                                                                                                                                                                                                                                                                                                                                                                                                                                                                                                                                                                                                              |
| Date Submitted by the Author:   | 21-Jan-2012                                                                                                                                                                                                                                                                                                                                                                                                                                                                                                                                                                                                                                           |
| Complete List of Authors:       | Tachibana, Yoshiyuki; University of Manchester and Manchester Academic Health Sciences Centre, Department of Child and Adolescent Psychiatry; Smart Aging International Research Center, IDAC, Tohoku University, Department of Applied Brain Science<br>Green, Jonathan; University of Manchester and Manchester Academic Health Sciences Centre, Department of Child and Adolescent Psychiatry<br>Hwang, Yeonhee; Special Support Education Research Center, Tohoku Fukushi University,<br>Emsley, Richard; University of Manchester and Manchester Academic Health Sciences Centre, Health Methodology Research Group, Department of Biostatistics |
| <b>Primary Subject Heading</b>: | Mental health                                                                                                                                                                                                                                                                                                                                                                                                                                                                                                                                                                                                                                         |
| Secondary Subject Heading:      | Paediatrics, Evidence-based practice, Neurology                                                                                                                                                                                                                                                                                                                                                                                                                                                                                                                                                                                                       |
| Keywords:                       | Paediatric neurology < PAEDIATRICS, Child & adolescent psychiatry < PSYCHIATRY, Neurology < INTERNAL MEDICINE                                                                                                                                                                                                                                                                                                                                                                                                                                                                                                                                         |
|                                 |                                                                                                                                                                                                                                                                                                                                                                                                                                                                                                                                                                                                                                                       |

SCHOLARONE™  
Manuscripts

1  
2  
3  
4  
5  
6  
7  
8  
9  
10  
11  
12  
13  
14  
15  
16  
17  
18  
19  
20  
21  
22  
23  
24  
25  
26  
27  
28  
29  
30  
31  
32  
33  
34  
35  
36  
37  
38  
39  
40  
41  
42  
43  
44  
45  
46  
47  
48  
49  
50  
51  
52  
53  
54  
55  
56  
57  
58  
59  
60

# A systematic review with meta-analysis of comprehensive interventions for pre-school children with autism spectrum disorder (ASD): study protocol

Yoshiyuki Tachibana M.D., Ph.D.<sup>1,2</sup>, Jonathan Green M.D.<sup>1</sup>, Yeonhee Hwang Ph.D.<sup>3</sup>,  
Richard Emsley Ph.D.<sup>4</sup>

<sup>1</sup> Department of Child and Adolescent Psychiatry, University of Manchester and Manchester Academic Health Sciences Centre, UK

2. Smart Aging International Research Centre, IDAC, Tohoku University, Japan

3. Special Support Education Research Centre, Tohoku Fukushi University, Japan

4. Health Methodology Research Group, Department of Biostatistics, University of Manchester and Manchester Academic Health Sciences Centre, UK

Correspondence to

Yoshiyuki Tachibana M.D., Ph.D.

Department of Child and Adolescent Psychiatry, University of Manchester and Manchester Academic Health Science Centre

Room 4.321 (East), Jean McFarlane Building, University Place, University of Manchester and Manchester Academic Health Sciences Centre, Oxford Road, Manchester, M13 9PL, UK

Tel/Fax: +44 (0) 161 306 7941; E-mail: yoshiyuki-tatibana@hotmail.co.jp

## ABSTRACT

**Introduction:** The aims of our study are to: i) conduct a systematic review of the intervention literature in preschool children with autism spectrum disorder (ASD), including types of interventions that are tested and the classification of outcome measures used; ii) to undertake a meta-analysis of the studies, allowing for the first time the comparison of different approaches to intervention using comparative outcomes. There are a number of alternative modalities of intervention for preschool children with ASD in use with different theoretical background and orientation, each of which tend to use different trial designs and outcome measures. There is at this time an urgent need for comprehensive systematic review and meta-analyses of intervention studies for preschool children with ASD, covering studies of adequate quality across different intervention types and measurement methods, with a view to identifying the best current evidence for preschool interventions in the disorder.

**Methods and analysis:** We will perform a systematic review of RCTs for preschool children with ASD aged 0 to 6, along with a meta-analysis of qualifying studies across intervention modality. We will classify the interventions for preschool children with ASD under three models; behaviour, multi-modal developmental, and communication-focused. Firstly, we will perform a systematic review. Then, we will conduct a meta-analysis by comparing the three models with various outcomes using an inverse variance method in a random effect model. We will synthesise each outcome of the studies for the three models using standardised mean differences.

**Dissemination and ethics:** This study will identify each intervention's strengths and weaknesses. This study may also suggest what kinds of elements future intervention programmes for children with ASD should have. We strongly believe those findings will be able to translated into the clinical practices and patients and their family benefits.

**Trial registration:**

1  
2  
3  
4  
5  
6  
7  
8  
9  
10  
11  
12  
13  
14  
15  
16  
17  
18  
19  
20  
21  
22  
23  
24  
25  
26  
27  
28  
29  
30  
31  
32  
33  
34  
35  
36  
37  
38  
39  
40  
41  
42  
43  
44  
45  
46  
47  
48  
49  
50  
51  
52  
53  
54  
55  
56  
57  
58  
59  
60

[http://www.crd.york.ac.uk/prospero/register\\_new\\_review.asp?RecordID=1349&UserID=230](http://www.crd.york.ac.uk/prospero/register_new_review.asp?RecordID=1349&UserID=230) (Registration No. CRD42011001349)

For peer review only

## INTRODUCTION

Recent epidemiological studies estimate a prevalence of 1:100 for autism spectrum disorder (ASD) <sup>1</sup>, an increase over reported rates in the past <sup>2</sup>. There has been increasing interest in developing effective interventions for young children with ASD, since the evidence suggests that early intervention programmes are indeed beneficial for children with ASD, often improving developmental functioning and decreasing maladaptive behaviours and symptom severity <sup>3</sup>, and also can improve outcomes in later years for many individuals <sup>4</sup>.

An increasing volume of published trials of psychosocial intervention programmes for preschool children with ASD have been seen in recent years. These programmes tend to fall into three models; i) those based on behaviour change which use applied behavioural analysis (ABA) (e.g. <sup>5</sup>); ii) those focused on therapies targeted at improving the social communication impairment, the core symptom of autism (e.g. <sup>6</sup>); iii) multimodal interventions targeted across areas of autistic children's development (e.g. <sup>7</sup>). In addition, an increasing number of these studies have followed CONSORT guidelines <sup>8</sup>, and some meta-analyses and systematic reviews about intervention programmes for preschool children with ASD have been published; e.g. <sup>9-11</sup>. These meta-analyses and systematic reviews focused exclusively on one or the others of these groups of intervention styles; there has been no systematic review or meta-analysis of studies comparing results from different types of intervention approach from the viewpoint of the three models. For clinicians and commissioners this poses a difficulty in making general choices in a field containing often strong and partisan claims of effect from different traditions of intervention. Related to this, there has been great variation in endpoint measures used in these reported studies, making comparison of effects between studies difficult. Specifically, there has been variation in whether endpoints have been framed in terms of specific autism symptom outcomes, non autism-specific

1  
2  
3  
4  
5  
6 outcomes that are not specific to autism (such as for instance IQ), or 'intermediate'  
7  
8 endpoints relating to aspects of development that may have some relationship to later  
9  
10 autism symptoms – examples would be changes in joint attention or parent-child  
11  
12 interaction. These latter two kinds of outcome are often reported, without necessarily  
13  
14 strong justification, as if they were the equivalent of change in autism symptoms (i.e. as  
15  
16 'surrogate' endpoints); and this can cause real confusion. We think that these  
17  
18 considerations indicate the need for a more comprehensive review of intervention  
19  
20 studies for preschool children with ASD, covering studies of adequate quality across  
21  
22 different intervention types and measurement methods, with a view to identifying the  
23  
24 best current evidence for preschool interventions in the disorder. In this study, we will  
25  
26 investigate it by comparing three major types of interventions with various outcomes.  
27

28 We will undertake a systematic review and a meta-analysis of RCTs for preschool  
29  
30 children with ASD. Recently, many RCTs for children with ASD have emerged  
31  
32 sufficient enough to perform meta-analyses. RCT methodology has been identified as  
33  
34 the gold standard in efficacy research<sup>12</sup>. In addition, meta-analyses of RCTs is at the top  
35  
36 of the evidence based medicine hierarchy<sup>13</sup>. Thus, the findings of this study will  
37  
38 provide strong evidence about interventions for children with ASD. Howlin et al. are  
39  
40 asserting that there are three main strands of early interventions for children with ASD):  
41  
42 programmes with a particular emphasis on the use of behavioural principle to improve  
43  
44 learning and behaviour; those that have a specific focus on communication; and those in  
45  
46 which developmental/educational strategies have been employed<sup>14</sup>. In this study, we  
47  
48 named those strands as behavioural, communication-focused, and multimodal  
49  
50 developmental interventions, respectively. Understanding the mechanisms that underlie  
51  
52 this attenuation of treatment effects and how these can be overcome is one current  
53  
54 challenge<sup>15</sup>. This study may reveal each type of the intervention's strong and weak  
55  
56 points to various kinds of treatment factors respectively. Its findings will guide us to  
57  
58  
59  
60

1  
2  
3  
4  
5  
6 develop new types of interventions to overcome the attenuation of treatment effects in  
7  
8 the core symptoms of autism. It will contribute to the appropriate choices of the  
9  
10 interventions for children with ASD for their families, clinicians, and the policymakers.

11  
12 The objective of our study is to: i) conduct a systematic review of all the preschool  
13  
14 intervention literature in ASD, including the type of intervention that is being tested and  
15  
16 classification of outcome measures used; ii) to undertake a meta-analysis of  
17  
18 methodologically adequate studies using the Cochrane tool, which will allow for the  
19  
20 first time comparison of different approaches to intervention on comparative outcome  
21  
22 measures.

## 23 24 25 26 **METHODS**

### 27 28 **Types of studies**

29  
30 We will include randomised controlled trials and subject these to a rating on the  
31  
32 Cochrane Collaboration tool for assessing risk of bias.

### 33 34 35 36 **Types of participants**

37  
38 Participants comprise preschool children aged 0 to 6 with a diagnosis of ASD as below.

39  
40 *Diagnostic and statistical Manual of Mental Disorders-IV-Text Revision (DSM-IV-TR)*

41  
42  
43 16

- 44  
45 ▪ Autistic disorder
- 46  
47 ▪ Asperger disorder
- 48  
49 ▪ Pervasive developmental disorder not otherwise specified (PDD-NOS)

50  
51 *International Classification of Diseases-10 (ICD-10)*<sup>17</sup>

- 52  
53 ▪ Childhood autism
- 54  
55 ▪ Asperger syndrome, atypical autism



- Other pervasive developmental disorders
- Pervasive developmental disorders, unspecified.

### **Types of interventions**

We classify interventions for preschool children with ASD in three groups; i) behavioural interventions – based essentially on learning theory and on applied behaviour analysis; ii) communication-focused interventions, targeting social communication impairment, as the core symptom of autism; iii) multimodal developmental interventions targeting a range of aspects of children’s development.

### **Types of outcome measures**

A feature of this review is that we will systematically classify the various outcome measures used within recent intervention trials into the following categories:

#### *Primary outcomes*

Autism behavioural symptoms: qualitative impairment in social interaction; qualitative impairment in communication; restricted repetitive and stereotyped patterns of behaviour, interests, and activities. These are the triad of diagnostic criteria for autism in DSM-IV-TR and the definitional symptoms of the disorder and key indicators of psychopathology (e.g. the autism Diagnostic Observation Schedule-Generic<sup>18</sup> will be used for these outcomes.).

#### *Secondary outcomes*

Non-specific developmental outcomes. These are not directly related by definition to autism diagnosis but are used in some studies as substitute outcomes – examples are adaptive behaviour (e.g. the Vineland Adaptive Behaviour Scale<sup>19</sup> will be used for this

1  
2  
3  
4  
5  
6  
7  
8  
9  
10  
11  
12  
13  
14  
15  
16  
17  
18  
19  
20  
21  
22  
23  
24  
25  
26  
27  
28  
29  
30  
31  
32  
33  
34  
35  
36  
37  
38  
39  
40  
41  
42  
43  
44  
45  
46  
47  
48  
49  
50  
51  
52  
53  
54  
55  
56  
57  
58  
59  
60

outcome), and IQ and cognitive development (e.g. the Wechsler Preschool and Primary Scale of Intelligence third edition<sup>20</sup> will be used for these outcomes.).

Intermediate outcomes relevant to the known development of autism – which might be candidates for surrogate endpoints. These outcomes are often defined as the proximal targets of intervention approaches from a developmental perspective. Examples (along with appropriate measures) are: measures of joint attention (the Early Social Communication Scales<sup>21</sup>), imitation ability (the Imitation Battery<sup>22</sup>), symbolic play (the Communication and Symbolic Behaviour Scales Developmental Profile<sup>23</sup>), parent-child interaction (the Dyadic Communication Measure for Autism<sup>24</sup>), receptive language (the MacArthur-Bates Communicative Development Inventory (MCDI<sup>25</sup>)), expressive language (MCDI<sup>25</sup>).

### Electronic searches

We will do a systematic review of the published work according to the PRISMA statement<sup>26</sup>. Relevant studies will be identified by searching the following data sources: PsycINFO (from 1956 to January, 2011), Medline via Ovid (from 1950 to January, 2011), ERIC (from 1950 to January, 2011) and the Cochrane database.

We will use the following search terms to search all trials registers and databases: “autism”, “autism spectrum disorder”, “ASD”, “high function autism”, “high function ASD”, “Asperger syndrome”, “pervasive developmental disorder”, “PDDNOS”, “intervention”, “treatment”, “therapy”, “communication”, “interpersonal”, “speech”, “interaction”, “synchrony”, “relationship”, “language”, “social”, “development”, “behavior”, “intensive behavioral intervention”, “trial”, and “outcome”. Their search will be limited by age group from 0 to 6 years old and “randomized controlled trial.” This search strategy has been peer-reviewed by a librarian of University of Manchester.

### Validity assessment

Two of the authors, Y.T., Y.H. will independently review the abstracts of the potentially relevant studies. This will be followed by a consensus discussion with J.G. The quality of the RCTs will be coded independently by Y.T. and Y.H. and disagreements will be resolved by consensus discussions.

### Searching other resources

Reference lists from identified trials and review articles will be manually scanned to identify any other relevant studies. The clinicalTrials.gov and the Cochrane Library website will be also searched for randomised trials that were registered as completed but not yet published.

### Data collection and analysis

#### *Selection of studies*

#### *Inclusion:*

1. Participants comprise preschool children with a diagnosis of ASD or pervasive developmental disorder (PDD).
2. Randomised controlled trials
3. Interventions delivered to the parents/guardians and/or directly to the child, by special educators, teachers, speech pathologists, psychologists, or other allied health professional students will be included.
4. Studies carried out while the children were at a preschool age between 0 and 6 years.

#### *Exclusion:*

1. The study was not primary research on preschool children with ASD.

1  
2  
3  
4  
5  
6 2. The study did not assess a cognitive/behavioural intervention for preschool children  
7 with ASD.

8  
9  
10 3. The study design was not a randomised controlled trial.

11  
12 4. Alternative or complementary medicine was used as the main intervention of the  
13 study.

14  
15 5. The intervention was a pharmacological one.

16  
17 6. The intervention was not classified into behavioural, multimodal developmental or  
18 communication-focused model.

19  
20 7. The control group received a specific early intervention programme for children with  
21 autism which was not a usual treatment provided by their local services.

22  
23 8. The study was judged to be in high risk of bias by the Cochrane Collaboration tool  
24 for assessing risk of bias.

25  
26 All citations sourced from the search strategy will be transferred to EndNote, a  
27 reference management database software. Initial screening of titles and abstracts by an  
28 experienced research fellow (YT) will eliminate all those citations obviously irrelevant  
29 to the topic, for example, prevalence studies, studies not relating to autism spectrum  
30 disorders, single case studies. Thereafter, two review authors (YT and YH) will assess  
31 and select studies for inclusion from the group of superficially relevant studies. In the  
32 event of a disagreement, resolution will be reached in discussion with the third author  
33 (JG), if necessary following inspection of the full paper.  
34  
35  
36  
37  
38  
39  
40  
41  
42  
43  
44  
45  
46  
47  
48

#### 49 **Data extraction and management**

50  
51 YT and YH will independently extract data from selected trials using a specially  
52 designed data extraction form. Extracted data will consist of methods (dose and  
53 frequency of intervention); diagnostic description of participants, and type of  
54  
55  
56  
57  
58  
59  
60

1  
2  
3  
4  
5  
6 intervention, including target, intensity, duration and method of application (parent-  
7 mediated, therapist, school-based etc.). Data will be extracted independently by two  
8 review authors (YT and YH) and disagreements will be resolved by negotiation with a  
9 third author (JG).  
10  
11  
12

### 13 14 15 16 **Assessment of risk of bias in the studies**

17  
18 Risk of bias will be assessed by two independent review authors (YT and YH) and  
19 disagreements will be resolved by negotiation with a third review author (JG). We will  
20 use the Cochrane Collaboration tool for assessing risk of bias in these areas <sup>27</sup>. The  
21 assessed risk of bias in studies will include in the following domains: sequence  
22 generation; allocation concealment; blinding; incomplete outcome data; selective  
23 outcome reporting; other sources of bias. The process will involve recording the  
24 appropriate information for each study (for example describing the method used to  
25 conceal allocation in detail) and evaluating whether there is risk of bias in that area (for  
26 example, was allocation adequately concealed). We will allocate studies to the three  
27 categories according to our judgment of each area or potential risk of bias: A. Low risk  
28 of bias; B. Moderate (or unclear) risk of bias; C. High risk of bias. Whether the studies  
29 should be included for the analyses or not will be judged individually based on the  
30 results of the risk of bias assessments.  
31  
32  
33  
34  
35  
36  
37  
38  
39  
40  
41  
42  
43  
44  
45  
46

### 47 **Measures of treatment effect**

#### 48 *Continuous data*

49  
50 Continuous data will be analysed on the basis that the means and standard deviations  
51 are available and that there is no clear evidence of skew in the distribution.  
52  
53  
54  
55  
56  
57  
58  
59  
60

### Dealing with missing data

Missing data will be assessed for each individual study. Where a loss of significant quantities of participant data is reported such that the review authors agree that the conclusions of the study are compromised, trial authors will be contacted. If no reply is forthcoming or full data are not made available, these studies will not be included in the final analysis. For included studies reporting drop-out, we will report the number of participants included in the final analysis as a proportion of those participants who began the intervention. Reasons for missing data will be reported. The extent to which the results of the review could be altered by the missing data will be assessed and discussed. If summary data are missing, trial authors will be contacted. If no reply is forthcoming or the required summaries are not made available, the authors will include the study in the review and assess and discuss the extent to which its absence from meta-analysis affects the review results.

### Assessment of heterogeneity

Consistency of results will be assessed visually and by chi-square tests<sup>28</sup>. In addition, since chi-square can have low power when only few studies or studies of a small sample size are available<sup>29</sup>, we will use the  $I^2$  statistic to calculate the degree to which heterogeneity is having an impact on the analysis<sup>30</sup>.

### Assessment of reporting biases

If sufficient studies are found, funnel plots will be drawn to investigate any relationship between effect size and sample size. Such a relationship could be due to publication or related biases, or due to systematic differences between small and large studies. If a

1  
2  
3  
4  
5  
6 relationship is identified, clinical diversity of the studies will be further examined as a  
7 possible explanation. Every attempt will be made to obtain unpublished data and data  
8 from conference proceedings.  
9  
10

### 11 12 13 **Data synthesis**

14  
15 Data synthesis will be performed using Review Manager version 5.1 (Cochrane  
16 Collaboration software). We will assess continuous and binary data. Assuming that two  
17 or more studies that are suitable for inclusion are found, and that the studies are  
18 considered to be homogenous, a meta-analysis will be performed on the results. The  
19 categories of outcome measure mentioned above differ conceptually in important ways,  
20 and have been used in a systematic different way across trials of the different  
21 intervention types identified above. Our review aims to make comparison across these  
22 different types of intervention study, thus we will standardise and synthesise the various  
23 categories of outcome measure using an inverse variance method in a random effect  
24 model<sup>30</sup>. We will compare the types of intervention model effectiveness for each  
25 outcome using a standardised mean difference.  
26  
27  
28  
29  
30  
31  
32  
33  
34  
35  
36  
37  
38  
39  
40

### 41 **Subgroup analysis and investigation of heterogeneity**

42  
43 We will undertake subgroup analyses and meta-regression. These will be pooled to  
44 calculate a final effect size. While these analyses may enable us to hypothesise as to  
45 possible causes of differences between studies' findings, some heterogeneity is likely to  
46 remain, and any statistical analysis will be accompanied by a narrative synthesis.  
47  
48  
49

50  
51 Subgroup analysis will be undertaken if clinically different interventions are  
52 identified, or there are clinically relevant differences between participant groups.  
53

54  
55 Anticipated clinically relevant differences are:  
56  
57  
58  
59  
60

- 1
- 2
- 3
- 4
- 5
- 6 1. intervention delivery type (e.g. therapist, parent-mediated, school-based) and length
- 7
- 8 2. intervention target skill (e.g. Theory of Mind as a whole, joint attention, emotion
- 9 recognition, false belief understanding)
- 10
- 11 3. participant age (e.g. preschool, young children), IQ (low versus normal or high),
- 12 specific diagnosis and verbal ability.
- 13
- 14

15 Relevant subgroup analyses will also include:

- 16 ·Severity of autism at baseline
- 17
- 18 ·Social economic status and other demographic variables
- 19
- 20 ·Age of child
- 21
- 22 ·Type of intervention (our 3 groups as above)
- 23
- 24 ·Parent-mediated (directing parents to train their children, not training the children
- 25 directly) vs. child-mediated (training the children directly) intervention delivery
- 26
- 27 ·Cognitive ability at baseline
- 28
- 29
- 30
- 31
- 32
- 33
- 34

### 35 **Sensitivity analysis**

36 Sensitivity analysis will be conducted to assess the impact of study quality on the results  
37 of the meta-analyses. For example, we will test to see if studies with high rates of loss to  
38 follow up or inadequate blinding are more likely to show positive outcomes and also to  
39 assess the impact of imputing missing data.  
40  
41  
42  
43  
44  
45  
46  
47

## 48 **DISCUSSION**

49 Meta-analysis of RCTs across types of intervention for preschool children with ASD is  
50 an important step in providing a reliable basis for implementation decisions. Since  
51 previous analyses have been essentially restricted to specific intervention types, and  
52 often with different outcome criteria, a study across three representative models:  
53  
54  
55  
56  
57  
58  
59  
60



1  
2  
3  
4  
5  
6 behavioural, multimodal developmental or communication-focused models will guide  
7  
8 future clinical practice and research trials for children with ASD. This study will  
9  
10 provide information about which kind of intervention has strong points and weak points,  
11  
12 and what are those strong points and weak points are. This study may also suggest what  
13  
14 kinds of elements future intervention programmes for children with ASD should have.  
15  
16 We strongly believe those findings will be able to translated into the clinical practices  
17  
18 and patients and their family benefits. Anticipated challenges in synthesise the  
19  
20 literature exist. The measures used for outcome are varied between studies and the  
21  
22 standardised data will be heterogeneous. We do not assume that each study is estimating  
23  
24 exactly the same quantity. Thus, we will use random effect models for the analyses<sup>30</sup>. In  
25  
26 addition, the durations of the interventions will be different among the studies included  
27  
28 in this study. We will synthesise the data regardless of the durations of the interventions,  
29  
30 and will discuss the diversity of the durations in our paper.  
31  
32  
33  
34  
35

36 **Authors' contribution** YT and JG contributed to draft the protocol and develop a  
37  
38 search strategy. YT also drafted this manuscript. RE contributed to provide statistical  
39  
40 advice for the design and the analysis. All authors read and approved the final  
41  
42 manuscript.  
43

44 **Acknowledgement** We thank Claire Hodkinson for the peer-reviewing of this study's  
45  
46 search strategy.  
47

48 **Competing interests** None.  
49

50 **Funding** This study was supported by JSPS titled 'Institutional Program for Young  
51  
52 Researcher Overseas Visits'.  
53  
54  
55

## 56 **References**

57  
58  
59  
60

- 1  
2  
3  
4  
5  
6 1. Baird G, Simonoff E, Pickles A, Chandler S, Loucas T, Meldrum D, et al. Prevalence  
7  
8 of disorders of the autism spectrum in a population cohort of children in South  
9  
10 Thames: the Special Needs and Autism Project (SNAP). *The Lancet*  
11  
12 2006;368(9531):210-15.
- 13  
14 2. Newschaffer CJ, Croen LA, Daniels J, Giarelli E, Grether JK, Levy SE, et al. The  
15  
16 epidemiology of autism spectrum disorders\*. *Annu. Rev. Public Health*  
17  
18 2007;28:235-58.
- 19  
20 3. Rogers SJ, Vismara LA. Evidence-based comprehensive treatments for early autism.  
21  
22 *Journal of clinical child and adolescent psychology: the official journal for the*  
23  
24 *Society of Clinical Child and Adolescent Psychology, American Psychological*  
25  
26 *Association, Division 53* 2008;37(1):8.
- 27  
28 4. Office USGA, Rights USCHCoGRSoH, Wellness. *Special education: children with*  
29  
30 *autism: report to the Chairman and Ranking Minority Member, Subcommittee on*  
31  
32 *Human Rights and Wellness, Committee on Government Reform, House of*  
33  
34 *Representatives: DIANE Publishing, 2005.*
- 35  
36 5. Smith T, Groen AD, Wynn JW. Randomized trial of intensive early intervention for  
37  
38 children with pervasive developmental disorder. *American Journal on Mental*  
39  
40 *Retardation* 2000;105(4):269-85.
- 41  
42 6. Green J, Charman T, McConachie H, Aldred C, Slonims V, Howlin P, et al. Parent-  
43  
44 mediated communication-focused treatment in children with autism (PACT): a  
45  
46 randomised controlled trial. *The Lancet* 2010;375(9732):2152-60.
- 47  
48 7. Dawson G, Rogers S, Munson J, Smith M, Winter J, Greenson J, et al. Randomized,  
49  
50 controlled trial of an intervention for toddlers with autism: the Early Start  
51  
52 Denver Model. *Pediatrics* 2010;125(1):e17.
- 53  
54 8. Campbell MK, Elbourne DR, Altman DG. CONSORT statement: extension to cluster  
55  
56 randomised trials. *Bmj* 2004;328(7441):702.
- 57  
58  
59  
60

- 1  
2  
3  
4  
5  
6 9. Eldevik S, Hastings RP, Hughes JC, Jahr E, Eikeseth S, Cross S. Meta-analysis of  
7  
8 early intensive behavioral intervention for children with Autism. *Journal of*  
9  
10 *Clinical Child and Adolescent Psychology* 2009;38(3):12.
- 11  
12 10. Spreckley M, Boyd R. Efficacy of applied behavioral intervention in preschool  
13  
14 children with autism for improving cognitive, language, and adaptive behavior:  
15  
16 a systematic review and meta-analysis. *The Journal of pediatrics*  
17  
18 2009;154(3):338-44.
- 19  
20 11. Makrygianni MK, Reed P. A meta-analytic review of the effectiveness of  
21  
22 behavioural early intervention programs for children with autistic spectrum  
23  
24 disorders. *Research in Autism Spectrum Disorders* 2010;4(4):577-93.
- 25  
26 12. Smith T, Scahill L, Dawson G, Guthrie D, Lord C, Odom S, et al. Designing  
27  
28 research studies on psychosocial interventions in autism. *Journal of autism and*  
29  
30 *developmental Disorders* 2007;37(2):354-66.
- 31  
32 13. Summerskill WSM. Hierarchy of evidence. *Key Topics in Evidence Based Medicine.*  
33  
34 *Oxford: Bios Scientific Publishers* 2001.
- 35  
36 14. Howlin P, Magiati I, Charman T. Systematic review of early intensive behavioral  
37  
38 interventions for children with autism. *Journal Information* 2009;114(1).
- 39  
40 15. Charman T. Commentary: Glass half full or half empty? Testing social  
41  
42 communication interventions for young children with autism-reflections on  
43  
44 Landa, Holman, O'Neil, and Stuart (2011). *Journal of Child Psychology and*  
45  
46 *Psychiatry* 2011;52(1):22-23.
- 47  
48 16. Association AP, DSM-IV. APTFo. *Diagnostic and statistical manual of mental*  
49  
50 *disorders: DSM-IV-TR: American Psychiatric Publishing, Inc., 2000.*
- 51  
52 17. Organization WH. *The ICD-10 classification of mental and behavioural disorders:*  
53  
54 *diagnostic criteria for research: World Health Organization, 1993.*
- 55  
56 18. Lord C, Risi S, Lambrecht L, Cook EH, Leventhal BL, DiLavore PC, et al. The  
57  
58  
59  
60

- 1  
2  
3  
4  
5  
6 Autism Diagnostic Observation Schedule—Generic: A standard measure of  
7 social and communication deficits associated with the spectrum of autism.  
8  
9  
10 *Journal of autism and developmental Disorders* 2000;30(3):205-23.
- 11  
12 19. Sparrow SS, Cicchetti DV. *The Vineland Adaptive Behavior Scales*: Allyn & Bacon,  
13 1989.
- 14  
15 20. Wechsler D. *Wechsler Preschool and Primary Scale of intelligence third edition*:  
16 San Antonio, TX: Harcourt Assessment, Inc, 2002.
- 17  
18 21. Mundy P, Delgado C, Block J, Venezia M, Hogan A, Seibert J. Early Social  
19  
20  
21  
22  
23  
24  
25  
26  
27  
28  
29  
30  
31  
32  
33  
34  
35  
36  
37  
38  
39  
40  
41  
42  
43  
44  
45  
46  
47  
48  
49  
50  
51  
52  
53  
54  
55  
56  
57  
58  
59  
60
20. Wechsler D. *Wechsler Preschool and Primary Scale of intelligence third edition*:  
San Antonio, TX: Harcourt Assessment, Inc, 2002.
21. Mundy P, Delgado C, Block J, Venezia M, Hogan A, Seibert J. Early Social  
Communication Scales (ESCS). *Coral Gables, FL: University of Miami* 2003.
22. Rogers SJ, Hepburn SL, Stackhouse T, Wehner E. Imitation performance in toddlers  
with autism and those with other developmental disorders. *Journal of Child  
Psychology and Psychiatry* 2003;44(5):763-81.
23. Wetherby AM, Prizant BM. *Communication and Symbolic Behavior Scales*:  
*Developmental Profile*: Paul H Brookes Publishing, 2002.
24. Aldred C, Green J, Adams C. A new social communication intervention for children  
with autism: pilot randomised controlled treatment study suggesting  
effectiveness. *Journal of Child Psychology and Psychiatry* 2004;45(8):1420-30.
25. Fenson L, Marchman VA, Thal D. The MacArthur-Bates Communicative  
Development Inventories User's Guide and Technical Manual 2006.
26. Moher D, Liberati A, Tetzlaff J, Altman DG. Preferred reporting items for systematic  
reviews and meta-analyses: the PRISMA statement. *PLoS Medicine*  
2009;6(7):e1000097.
27. Higgins J, Green S. *Cochrane Handbook for Systematic Reviews of Interventions*  
Version 5.1. 0 [updated March 2011]. *The Cochrane Collaboration* 2011.
28. Deeks JJ, Altman DG, Bradburn MJ. *Statistical Methods for Examining  
Heterogeneity and Combining Results from Several Studies in Meta-Analysis*.

1  
2  
3  
4  
5  
6  
7  
8  
9  
10  
11  
12  
13  
14  
15  
16  
17  
18  
19  
20  
21  
22  
23  
24  
25  
26  
27  
28  
29  
30  
31  
32  
33  
34  
35  
36  
37  
38  
39  
40  
41  
42  
43  
44  
45  
46  
47  
48  
49  
50  
51  
52  
53  
54  
55  
56  
57  
58  
59  
60

*Systematic reviews in health care* 2001:285-312.

29. Higgins J, Thompson SG, Deeks JJ, Altman DG. Measuring inconsistency in meta-analyses. *Bmj* 2003;327(7414):557.

30. Higgins DJPT, Green S. *Cochrane handbook for systematic reviews of interventions*: Wiley Online Library, 2008.

For peer review only

1  
2  
3  
4  
5  
6  
7  
8  
9  
10  
11  
12  
13  
14  
15  
16  
17  
18  
19  
20  
21  
22  
23  
24  
25  
26  
27  
28  
29  
30  
31  
32  
33  
34  
35  
36  
37  
38  
39  
40  
41  
42  
43  
44  
45  
46  
47  
48  
49  
50  
51  
52  
53  
54  
55  
56  
57  
58  
59  
60

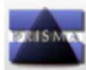

**PRISMA 2009 Flow Diagram**  
**Interventions based on behavioural, developmental or communication-focused models for ASD in pre-school children 0-6 years**

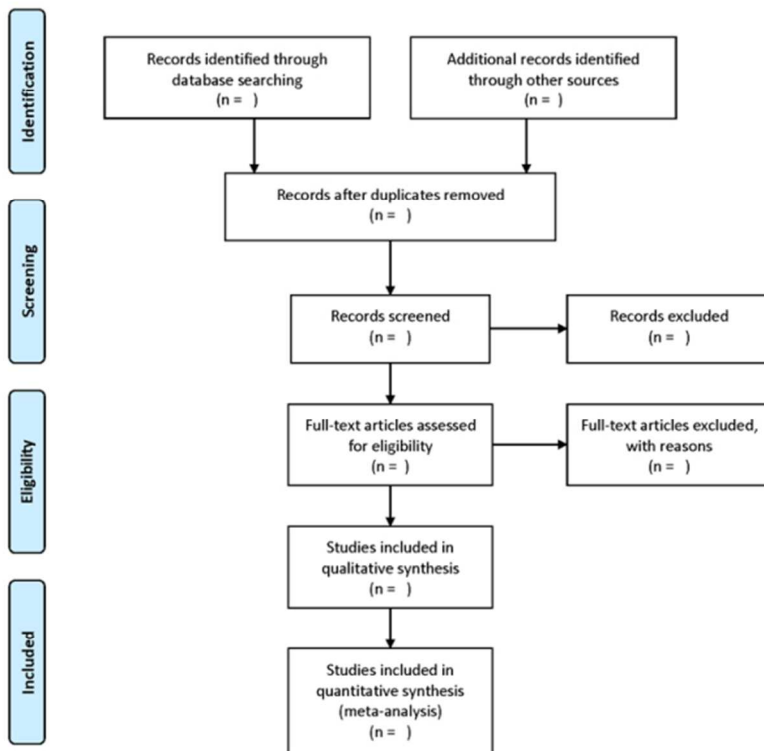

From: Moher D, Liberati A, Tetzlaff J, Altman DG, The PRISMA Group (2009). Preferred Reporting Items for Systematic Reviews and Meta-Analyses: The PRISMA Statement. PLoS Med 6(6): e1000097. doi:10.1371/journal.pmed1000097

For more information, visit [www.prisma-statement.org](http://www.prisma-statement.org).

Caption: Figure 1  
Legend: Flow diagram of this study

January 20th, 2012

The BMJ Open Editorial Office

Dear Editor,

RE: BMJ Open - Decision on Manuscript ID bmjopen-2011-000679.R1

Thank you very much for your editorial work on our manuscript entitled “A systematic review with meta-analysis of comprehensive interventions for preschool children with autism spectrum disorder: study protocol”. We also very much appreciate Dr. Iliana Magiati’s helpful suggestions. We took her comments into account in our revised manuscript.

Responses to Dr. Iliana Magiati’s comments:

- Consider replacing the term “preschool autism spectrum disorder” with “preschool children with ASD” throughout the document in order to meet APA guidelines regarding best use of language to describe participants

The term “preschool autism spectrum disorder” has now been replaced with “preschool children with ASD” throughout the document.

- Despite the good standard of English language, I would still advice the authors to review their manuscript one more time for grammar and syntax.

Our manuscript has now been reviewed for grammar and syntax.

- Change “most” individuals in final line of first paragraph to “many” individuals – in fact, many outcome studies in adulthood show that many individuals remain very vulnerable and in need of services.

This has now been changed.

- Please consider including one or two references as examples of behavioral, social-communication and multimodal developmental interventions in the second paragraph of the introduction.

One reference for each model has now been included.

In more detail,

These programmes tend to fall into three models; i) those based on behaviour change which use applied behavioural analysis (ABA) (e.g. <sup>5</sup>); ii) those focused on therapies targeted at improving the social communication impairment, the core symptom of

1  
2  
3  
4  
5 autism (e.g. <sup>6</sup>); iii) multimodal interventions targeted across areas of autistic children's  
6 development (e.g. <sup>7</sup>).  
7  
8

9  
10 **References:**

11 5. Smith T, Groen AD, Wynn JW. Randomized trial of intensive early intervention for  
12 children with pervasive developmental disorder. American Journal on Mental  
13 Retardation 2000;105(4):269-85.

14 6. Green J, Charman T, McConachie H, Aldred C, Slonims V, Howlin P, et al.  
15 Parent-mediated communication-focused treatment in children with autism (PACT): a  
16 randomised controlled trial. The Lancet 2010;375(9732):2152-60.

17 7. Dawson G, Rogers S, Munson J, Smith M, Winter J, Greenson J, et al. Randomized,  
18 controlled trial of an intervention for toddlers with autism: the Early Start Denver  
19 Model. Pediatrics 2010;125(1):e17.  
20  
21  
22  
23

24  
25  
26 - Can you clarify what you mean by “intermediate developmental endpoints” and  
27 “surrogate endpoints” (p.4, last line, p.5 first line)?

28 ‘Surrogate endpoint’ is a well characterized term in the trials and  
29 intervention literature – essential an intermediate outcome that is a  
30 proximal equivalent to the endpoint change desired (for in change in  
31 immune status after vaccine) and can in some way ‘stand for it’. The text  
32 now clarifies our meaning here in relation to the intermediate  
33 developmental endpoints reported in studies.  
34  
35  
36

37 In more detail,

38 Specifically, there has been variation in whether endpoints have been framed in terms of  
39 specific autism symptom outcomes, non autism-specific outcomes that are not specific  
40 to autism (such as for instance IQ), or ‘intermediate’ endpoints relating to aspects of  
41 development that may have some relationship to later autism symptoms – examples  
42 would be changes in joint attention or parent-child interaction. These latter two kinds of  
43 outcome are often reported, without necessarily strong justification, as if they were the  
44 equivalent of change in autism symptoms (i.e. as ‘surrogate’ endpoints); and this can  
45 cause real confusion.  
46  
47  
48  
49  
50

51  
52 - Clarify the “quality criteria” ratings mentioned in Methods, Type of Studies section.

53 This part has now been corrected as below.

54 We will include randomized controlled trials and subject these to a rating on the  
55 Cochrane Collaboration tool for assessing risk of bias.  
56  
57  
58  
59  
60



1  
2  
3  
4  
5  
6  
7 - I am not sure that “adaptive behavior functioning” as measured by the Vineland  
8 Adaptive Behaviour Scales constitutes an intermediate outcome – social and  
9 communication skills are primary areas of difficulty in ASD and I would think they are  
10 primary or secondary outcome.

11 We agree with the reviewer and “Adaptive behaviour functioning” has  
12 now been put into the secondary outcomes.  
13

14  
15  
16  
17 - Please consider including “trial” and “outcome” too in your search terms.

18 These have now been included in the search terms.  
19

20  
21 - The exclusion criteria need to be more clearly written with more attention to language/  
22 grammar.

23 The exclusion criteria have now been corrected.  
24

25  
26  
27 - With exclusion criterion 7 do you mean that you will exclude all studies who do not  
28 have a TAU comparison group? What if a study compares a behavioral with a  
29 developmental approach? Wouldn't the findings of such a study be directly relevant to  
30 the aims of your systematic review and meta-analysis?

31 We need to limit the studies to those using a TAU comparison group  
32 because of our statistical analyses. Following Cochrane Handbook for  
33 Systematic Reviews of Intervention, we are using an inverse variance  
34 method within a random effects model. This requires treatment of TAU  
35 arms in a standard way – excluding comparisons of two test treatments in  
36 which the baselines are not TAU.  
37  
38  
39  
40  
41

42  
43 - Please delete the age groups of adolescents and adults from your list in p. 13, point 3,  
44 as your study is only on pre-school children.

45 These have now been deleted.  
46

47  
48  
49 - The first paragraph of the discussion needs to be written in a more “moderate” tone –  
50 i.e. “this study will provide the most reliable basis for decisions on early intervention”.  
51 Clearly this depends on the quality of the study eventually so best to rephrase to “can  
52 provide a more reliable basis”.

53 The first paragraph of the discussion has now been corrected according to  
54 these comments.  
55  
56  
57  
58  
59  
60

1  
2  
3  
4  
5  
6  
7  
8  
9  
10  
11  
12  
13  
14  
15  
16  
17  
18  
19  
20  
21  
22  
23  
24  
25  
26  
27  
28  
29  
30  
31  
32  
33  
34  
35  
36  
37  
38  
39  
40  
41  
42  
43  
44  
45  
46  
47  
48  
49  
50  
51  
52  
53  
54  
55  
56  
57  
58  
59  
60

In more detail,

Meta-analysis of RCTs across types of intervention for preschool children with ASD is an important step in providing a reliable basis for implementation decisions. Since previous analyses have been essentially restricted to specific intervention types, and often with different outcome criteria, a study across three representative models: behavioural, multimodal developmental or communication-focused models will guide future clinical practice and research trials for children with ASD.

All correspondence should be sent to

Yoshiyuki Tachibana M.D., Ph.D.

Room 4.321, Psychiatry Research Group, 4th Floor (East), Jean McFarlane Building,  
University Place, University of Manchester and Manchester Academic Health Sciences  
Centre, Oxford Road, Manchester, M13 9PL, UK

Tel/Fax: +44 (0) 161 306 7941; E-mail: yoshiyuki-tatibana@hotmail.co.jp

We are looking forward to your replies.

Sincerely yours,

Yoshiyuki Tachibana

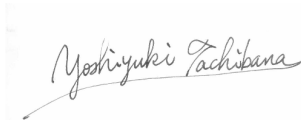

1  
2  
3  
4  
5  
6  
7  
8  
9  
10  
11  
12  
13  
14  
15  
16  
17  
18  
19  
20  
21  
22

A systematic review with meta-analysis of comprehensive interventions for pre-school children with autism spectrum disorder (ASD): study protocol

Formatted: Font: 20 pt, No underline

~~A systematic review with meta-analysis of different models of intervention for pre-school autism: study protocol~~

Formatted: Font: 20 pt, No underline

23  
24  
25  
26

Yoshiyuki Tachibana M.D., Ph.D.<sup>1,2</sup>, Jonathan Green M.D.<sup>1</sup>, Yeonhee Hwang Ph.D.<sup>3</sup>,  
Richard Emsley Ph.D.<sup>4</sup>

27  
28  
29

<sup>1</sup> Department of Child and Adolescent Psychiatry, University of Manchester and  
Manchester Academic Health Sciences Centre, UK

30  
31  
32  
33

~~2. Department of Applied Brain Science,~~ Smart Aging International Research Centre,  
IDAC, Tohoku University, Japan

34  
35

3. Special Support Education Research Centre, Tohoku Fukushi University, Japan

36  
37  
38

4. Health Methodology Research Group, Department of Biostatistics, University of  
Manchester and Manchester Academic Health Sciences Centre, UK

39  
40  
41

Correspondence to

42  
43  
44

Yoshiyuki Tachibana M.D., Ph.D.

45  
46  
47

Department of Child and Adolescent Psychiatry, University of Manchester and  
Manchester Academic Health Sciences Centre

48  
49  
50  
51  
52  
53  
54

Room 4.321, ~~Psychiatry Research Group, 4<sup>th</sup> Floor~~ (East), Jean McFarlane Building,  
University Place, University of Manchester and Manchester Academic Health Sciences  
Centre, Oxford Road, Manchester, M13 9PL, UK

1  
2  
3  
4  
5  
6  
7  
8  
9  
10  
11  
12  
13  
14  
15  
16  
17  
18  
19  
20  
21  
22  
23  
24  
25  
26  
27  
28  
29  
30  
31  
32  
33  
34  
35  
36  
37  
38  
39  
40  
41  
42  
43  
44  
45  
46  
47  
48  
49  
50  
51  
52  
53  
54  
55  
56  
57  
58  
59  
60

Tel/Fax: +44 (0) 161 306 7941; E-mail: yoshiyuki-tatibana@hotmail.co.jp

Formatted: Left

Formatted: Font: (Asian) Japanese

Formatted: Left, No widow/orphan control

Formatted: Left

For peer review only

## ABSTRACT

**~~Aim~~Introduction:** The aims of our study are to: i) conduct a systematic review of the intervention literature in preschool children with autism spectrum disorder (ASD), including types of interventions that ~~is-are~~ tested and the classification of outcome measures used; ii) to undertake a meta-analysis of the studies, allowing for the first time the comparison of different approaches to intervention using comparative outcomes.

**~~Background:~~** There are a number of alternative modalities of intervention for preschool children with ASD in use with different theoretical background and orientation, each of which tend to use different trial designs and outcome measures; ~~and there has been no comparative review to date across intervention modality in order to inform clinical decisions.~~ There is at this time an urgent need for comprehensive systematic review and meta-analyses of intervention studies for preschool children with ASD, covering studies of adequate quality across different intervention types and measurement methods, with a view to identifying the best current evidence for pre-school interventions in the disorder.

**~~Design and methods~~Methods and analysis:** We will perform a systematic review of RCTs for preschool children with ASD aged 0 to 6, along with a meta-analysis of qualifying studies across intervention modality. We will classify the interventions for preschool children with ASD under three models; behaviour, multi-modal developmental, and communication-focused. Firstly, we will perform a systematic review. Then, we will conduct a meta-analysis by comparing the three models with various outcomes using an inverse variance method in a random effect model. We will synthesise each outcome of the studies for the three models using ~~standardized~~ standardised mean differences.

**~~Discussion~~Dissemination and ethics:** This study will identify each intervention's strengths and weaknesses. This study may also suggest what kinds of elements future

Formatted: Font: (Asian) Japanese

1  
2  
3  
4  
5  
6  
7  
8  
9  
10  
11  
12  
13  
14  
15  
16  
17  
18  
19  
20  
21  
22  
23  
24  
25  
26  
27  
28  
29  
30  
31  
32  
33  
34  
35  
36  
37  
38  
39  
40  
41  
42  
43  
44  
45  
46  
47  
48  
49  
50  
51  
52  
53  
54  
55  
56  
57  
58  
59  
60

~~intervention programmes for children with ASD should have. This study may also reveal what points are lacking among the current intervention programmes for children with ASD.~~ We strongly believe those findings will be able to translated into the clinical practices and patients and their family benefits.

**Trial registration:**

[http://www.crd.york.ac.uk/prospero/register\\_new\\_review.asp?RecordID=1349&UserID=230](http://www.crd.york.ac.uk/prospero/register_new_review.asp?RecordID=1349&UserID=230) (Registration No. CRD42011001349)

Formatted: Font: Font color: Auto

Formatted: Font: Bold

Formatted: Font: Not Bold

Formatted: Font: (Asian) Japanese

Formatted: Left

For peer review only

## INTRODUCTION

Recent epidemiological studies estimate a prevalence of 1:100 for autism spectrum disorder (ASD) <sup>1</sup>, ~~which is a surprising~~ increase over ~~reported~~ rates ~~reported~~ in the past <sup>2</sup>. There has been increasing interest in developing effective interventions for young children with ASD, since the evidence suggests that early intervention programmes are indeed beneficial for children with ASD, often improving developmental functioning and decreasing maladaptive behaviours and symptom severity <sup>3</sup>, and also can improve outcomes in later years for ~~many most~~ individuals <sup>4</sup>.

An increasing volume of published trials of psychosocial intervention programmes for preschool ~~children with~~ ASD have been seen in recent years. These programmes tend to fall into three models; i) those based on behaviour change which use applied behavioural analysis (ABA) ~~(e.g. <sup>5</sup>)~~; ii) those focused on therapies targeted at improving the social communication impairment, the core symptom of autism ~~(e.g. <sup>6</sup>)~~; iii) multimodal interventions targeted across areas of autistic children's development ~~(e.g. <sup>7</sup>)~~. In addition, an increasing number of these studies have followed CONSORT guidelines <sup>8</sup>, and some meta-analyses and systematic reviews about intervention programmes for preschool children ~~with ASD~~ have been published; ~~e.g. <sup>9-11</sup>~~. These meta-analyses and systematic reviews focused exclusively on one or ~~the others~~ of these groups of intervention styles; there has been no systematic review or meta-analysis of studies comparing results from different types of intervention approach from the viewpoint of the three models. For clinicians and commissioners this poses a difficulty in making general choices in a field containing often strong and partisan claims of effect from different traditions of intervention. Related to this, there has been great variation in endpoint measures used in these reported studies, making ~~the comparisons~~ of ~~the effects between studies~~ difficult. Specifically, there has been variation in whether endpoints have been framed in terms of specific autism symptom outcomes, non autism-specific

Formatted: Do not check spelling or grammar, Superscript

Formatted: Do not check spelling or grammar, Superscript

Formatted: Do not check spelling or grammar, Superscript

outcomes that are not specific to autism (such as for instance IQ), or 'intermediate' developmental endpoints relating to aspects of development that may have some relationship to later autism symptoms – examples would be changes in joint attention or parent-child interaction. These, and these latter two kinds of outcome are have often been reported, without necessarily strong justification, as if they were the equivalent of change in autism symptoms (i.e. as 'surrogate' endpoints); and this can cause real confusion, for autism specific symptoms or disorder. We think that these considerations indicate the need for a more comprehensive review of intervention studies for preschool children with ASD, covering studies of adequate quality across different intervention types and measurement methods, with a view to identifying the best current evidence for preschool interventions in the disorder. In this study, we will investigate it by comparing three major types of interventions with various outcomes.

We will undertake a systematic review and a meta-analysis of RCTs for preschool children with ASD. Recently, many RCTs for children with ASD have been emerged as sufficient enough as to perform meta-analyses. RCT methodology has been identified as the gold standard in efficacy research <sup>12</sup>. In addition, meta-analyses of RCTs is at the top hierarchy of the evidence based medicine hierarchy <sup>13</sup>. Thus, the findings of this study will be very provide strong evidence about interventions for children with ASD. Howlin et al. are asserting that there are three main strands of early interventions for children with ASD): programmes with a particular emphasis on the use of behavioural principle to improve learning and behaviour; those that have a specific focus on communication; and those in which developmental/educational strategies have been employed <sup>14</sup>. In this study, we named those strands as behavioural, communication-focused, and multimodal developmental interventions, respectively. We classify the interventions for preschool children with ASD under the three models; i.e. behaviour model, developmental model, and communication focused model. Understanding the mechanisms that underlie this

Formatted: Font: Times New Roman

Formatted: HTML Preformatted, Justified, First line: 1 ch, Space Before: 0 pt, After: 0 pt

Formatted: Font: Times New Roman



attenuation of treatment effects and how these can be overcome is one current challenge

<sup>15</sup> ~~This study may reveal each type of the intervention's strong and weak points. This study will reveal which type of interventions is the most effective~~ to various kinds of treatment factors respectively. Its findings will guide us to develop new types of interventions to overcome the attenuation of treatment effects in the core symptoms of autism. It will contribute to the appropriate choices of the interventions for children with ASD for their families, clinicians, and the policymakers.

Formatted: Font: Times New Roman

Formatted: Font: Times New Roman

Formatted: Font: (Default) Times New Roman, Font color: Black

The objective of our study is to: i) conduct a systematic review of all the preschool intervention literature in ASD, including the type of intervention that is being tested and classification of outcome measures used; ii) to undertake a meta-analysis of methodologically adequate studies using the Cochrane tool, which will allow for the first time comparison of different approaches to intervention on comparative outcome measures.

## METHODS

### Types of studies

We will include ~~randomized-randomised~~ controlled trials and subject these to a rating on ~~the Cochrane Collaboration tool for assessing risk of bias~~ quality criteria.

### Types of participants

~~Participants comprise preschool children aged 0 to 6 with a diagnosis of ASD as below.~~

Formatted: No underline

Formatted: No underline

~~*Diagnostic and statistical Manual of Mental Disorders-IV-Text Revision (DSM-IV-TR)*~~

Formatted: Font: Italic, No underline

<sup>16</sup>

Formatted: Font: Italic

Formatted: No underline

~~▪ Autistic disorder~~

~~▪ Asperger disorder~~

- Pervasive developmental disorder not otherwise specified (PDD-NOS)

International Classification of Diseases-10 (ICD-10)<sup>17</sup>

- Childhood autism
- Asperger syndrome, atypical autism
- Other pervasive developmental disorders
- Pervasive developmental disorders, unspecified.

~~Participants comprise preschool children with a diagnosis of autism spectrum disorder (ASD) aged 0 to 6.~~

### Types of interventions

We classify interventions for preschool children with ASD in three groups; i) behavioural interventions – based essentially on learning theory and on applied behaviour analysis; ii) communication-focused interventions, targeting social communication impairment, as the core symptom of autism; iii) multimodal developmental interventions targeting a range of aspects of children's development.

### Types of outcome measures

A feature of this review is that we will systematically classify the various outcome measures used within recent intervention trials into the following categories:

#### *Primary outcomes*

Autism behavioural symptoms: qualitative impairment in social interaction; qualitative impairment in communication; restricted repetitive and stereotyped patterns of behaviour, interests, and activities. These are the triad of diagnostic criteria for autism in DSM-IV-TR and the definitional symptoms of the disorder and key indicators of

Formatted: Font: Italic, No underline

Formatted: Font: Italic

Formatted: Font: Italic, No underline

Formatted: No underline

psychopathology (e.g. the autism Diagnostic Observation Schedule-Generic<sup>18</sup> will be used for these outcomes.)-

Formatted: No underline

Formatted: No underline

### Secondary outcomes

Non-specific developmental outcomes. These are not directly related by definition to autism diagnosis but are used in some studies as substitute outcomes – examples are adaptive behaviour (e.g. the Vineland Adaptive Behaviour Scale<sup>19</sup> will be used for this outcome), and IQ and cognitive development (e.g. the Wechsler Preschool and Primary Scale of Intelligence third edition<sup>20</sup> will be used for these outcomes.)-

Formatted: Do not check spelling or grammar, Superscript

Formatted: No underline

Formatted: No underline

Intermediate outcomes relevant to the known development of autism – which might be candidates for surrogate endpoints. These outcomes are often defined as the proximal targets of intervention approaches from a developmental perspective. Examples (along with appropriate measures) are: measures of –<sup>19</sup> joint attention (the Early Social Communication Scales<sup>21</sup>), imitation ability (the Imitation Battery<sup>22</sup>), symbolic play (the Communication and Symbolic Behaviour Scales Developmental Profile<sup>23</sup>), parent-child interaction (the Dyadic Communication Measure for Autism<sup>24</sup>), receptive language (the MacArthur-Bates Communicative Development Inventory (MCDI<sup>25</sup>)), expressive language (MCDI<sup>25</sup>).

Formatted: No underline

~~Intermediate outcomes relevant to the known development of autism – which might be candidates for surrogate endpoints. These outcomes are often defined as the proximal targets of intervention approaches from a developmental perspective. Examples are: measures of joint attention, parent-child interaction, imitation ability, symbolic play, social communication in an interactive setting, receptive language, expressive language.~~

### Electronic searches

1  
2  
3  
4  
5  
6  
7  
8  
9 We will do a systematic review of the published work according to the PRISMA  
10 statement<sup>26</sup>. Relevant studies will be identified by searching the following data sources:  
11  
12 PsycINFO (from 1956 to January, 2011), Medline via Ovid (from 1950 to January,  
13  
14 2011), ERIC (from 1950 to January, 2011) and the Cochrane database.

15  
16 We will use the following search terms to search all trials registers and databases:  
17  
18 “autism”, “autism spectrum disorder”, “ASD”, “high function autism”, “high function  
19  
20 ASD”, “Asperger syndrome”, “pervasive developmental disorder”, “PDDNOS”,  
21  
22 “intervention”, “treatment”, “therapy”, “communication”, “interpersonal”, “speech”,  
23  
24 “interaction”, “synchrony”, “relationship”, “language”, “social”, ~~and~~ “development”,  
25  
26 “behavior-~~therapy~~”, “intensive behavioral intervention”, “trial”, and “outcome”. Their  
27  
28 search will be limited by age group from 0 to 6 years old and “randomized controlled  
29  
30 trial.” This search strategy has been peer-reviewed by a librarian of University of  
31  
32 Manchester.

### 33 34 **Validity assessment**

35  
36 Two of the authors, Y.T., Y.H. ~~independently~~ will independently review the abstracts of  
37  
38 the potentially ~~the~~ relevant studies. This will be followed by a consensus discussion  
39  
40 with J.G. The quality of the RCTs will be coded independently by Y.T. and Y.H. and  
41  
42 disagreements will be resolved by consensus discussions.

### 43 44 **Searching other resources**

45  
46 Reference lists from identified trials and review articles will be manually scanned to  
47  
48 identify any other relevant studies. The clinicalTrials.gov and the Cochrane Library  
49  
50 website will be also searched for ~~randomized-randomised~~ trials that were registered as  
51  
52 completed but not yet published.  
53  
54

## Data collection and analysis

### *Selection of studies*

#### *Inclusion:*

1. Participants comprise preschool children with a diagnosis of ASD or pervasive developmental disorder (PDD).
2. ~~Randomized~~ Randomised controlled trials
3. Interventions delivered to the parents/guardians and/or directly to the child, by special educators, teachers, speech pathologists, psychologists, or other allied health professional students will be included.
4. Studies carried out while the children were at a preschool age between 0 and 6 years.
5. ~~The control group will be those who did not received early intervention for autism.~~
6. ~~Studies judged to be in low risk of bias according to the Cochrane Collaboration tool for assessing risk of bias~~

#### *Exclusion:*

1. The study was not primary research on preschool children with ASDautism.
2. The study did not assess a cognitive/behavioural intervention for preschool children with ASDautism.
3. ~~The study did not report adequately on any measurable data for health related outcomes relevant to the review.~~
4. The study design was not a randomisized controlled trial.
5. ~~The intervention used alternative medicine. Alternative or complementary medicine was used as the main intervention of the study.~~
6. The intervention was a pharmacological one.

Formatted: Font: (Asian) Japanese

1  
2  
3  
4  
5  
6  
7  
8  
9  
10  
11  
12  
13  
14  
15  
16  
17  
18  
19  
20  
21  
22  
23  
24  
25  
26  
27  
28  
29  
30  
31  
32  
33  
34  
35  
36  
37  
38  
39  
40  
41  
42  
43  
44  
45  
46  
47  
48  
49  
50  
51  
52  
53  
54  
55  
56  
57  
58  
59  
60

67. The intervention was not classified into behavioural, multimodal developmental or communication-focused model.

78. The control group received ~~a specific early intervention programme for children with autism which was not a usual treatment provided by their local services, some early intervention for children with autism.~~

89. ~~Studies~~ ~~The study was~~ judged to be in high risk of bias ~~by according to~~ the Cochrane Collaboration tool for assessing risk of bias.

All citations sourced from the search strategy will be transferred to EndNote, a reference management database software. Initial screening of titles and abstracts by an experienced research fellow (YT) will eliminate all those citations obviously irrelevant to the topic, for example, prevalence studies, studies not relating to autism spectrum disorders, single case studies. Thereafter, two review authors (YT and YH) will assess and select studies for inclusion from the group of superficially relevant studies. In the event of a disagreement, resolution will be reached in discussion with the third author (JG), if necessary following inspection of the full paper.

### Data extraction and management

YT and YH will independently extract data from selected trials using a specially designed data extraction form. Extracted data will consist of methods (dose and frequency of intervention); diagnostic description of participants, and type of intervention, including target, intensity, duration and method of application (parent-mediated, therapist, school-based etc.). Data will be extracted independently by two review authors (YT and YH) and disagreements will be resolved by negotiation with a third author (JG).

### Assessment of risk of bias in the studies

Risk of bias will be assessed by two independent review authors (YT and YH) and disagreements will be resolved by negotiation with a third review author (JG). We will use the Cochrane Collaboration tool for assessing risk of bias in these areas<sup>27</sup>. The assessed risk of bias in studies will include in the following domains: sequence generation; allocation concealment; blinding; incomplete outcome data; selective outcome reporting; other sources of bias. The process will involve recording the appropriate information for each study (for example describing the method used to conceal allocation in detail) and evaluating whether there is risk of bias in that area (for example, was allocation adequately concealed). We will allocate studies to the three categories according to our judgment of each area or potential risk of bias: A. Low risk of bias; B. Moderate (or unclear) risk of bias; C. High risk of bias. Whether the studies should be included for the analyses or not will be judged individually based on the results of the risk of bias assessments.

### Measures of treatment effect

#### Continuous data

Continuous data will be analysed on the basis that the means and standard deviations are available and that there is no clear evidence of skew in the distribution.

#### ~~Measures of treatment effect—~~

~~The categories of outcome measure differ conceptually in important ways, and have been used in a systematic different way across trials of the different intervention types identified above. Our review aims for the first time to make comparison across these different types of intervention study, thus we will standardize and synthesize the various categories of outcome measure using an inverse variance method. The measures used~~

~~for outcome are varied between studies and the standardized data will be heterogeneous. We will use a random effects model for the analyses, comparing type of intervention model effectiveness for each outcome using a standardized mean difference. This is a novel approach for this field.~~

### Dealing with missing data

Missing data will be assessed for each individual study. Where a loss of significant quantities of participant data is reported such that the review authors agree that the conclusions of the study are compromised, trial authors will be contacted. If no reply is forthcoming or full data are not made available, these studies will not be included in the final analysis. For included studies reporting drop-out, we will report the number of participants included in the final analysis as a proportion of those participants who began the intervention. Reasons for missing data will be reported. The extent to which the results of the review could be altered by the missing data will be assessed and discussed. If summary data are missing, trial authors will be contacted. If no reply is forthcoming or the required summaries are not made available, the authors will include the study in the review and assess and discuss the extent to which its absence from meta-analysis affects the review results.

### Assessment of heterogeneity

~~Consistency of results will be assessed visually and by chi-square tests<sup>28</sup>. In addition, since chi-square can have low power when only few studies or studies of a small sample size are available<sup>29</sup>, we will use the  $I^2$  statistic to calculate the degree to which heterogeneity is having an impact on the analysis<sup>30</sup>.~~



1  
2  
3  
4  
5  
6  
7  
8  
9  
10  
11  
12  
13  
14  
15  
16  
17  
18  
19  
20  
21  
22  
23  
24  
25  
26  
27  
28  
29  
30  
31  
32  
33  
34  
35  
36  
37  
38  
39  
40  
41  
42  
43  
44  
45  
46  
47  
48  
49  
50  
51  
52  
53  
54  
55  
56  
57  
58  
59  
60

~~Consistency of results will be assessed visually and by a Chi<sup>2</sup> test. If the meta-analysis includes only a small number of studies, or where studies have small sample sizes, a P value of 0.10 will be applied for statistical significance. In addition, since Chi<sup>2</sup> can have low power when only few studies or studies of a small sample size are available, we will use the I<sup>2</sup> statistic to calculate the degree to which heterogeneity is having an impact on the analysis (Higgins 2008).~~

### Assessment of reporting biases

If sufficient studies are found, funnel plots will be drawn to investigate any relationship between effect size and sample size. Such a relationship could be due to publication or related biases, or due to systematic differences between small and large studies. If a relationship is identified, clinical diversity of the studies will be further examined as a possible explanation. Every attempt will be made to obtain unpublished data and data from conference proceedings.

### Data synthesis

Data synthesis will be performed using Review Manager version 5.1 (Cochrane Collaboration software). We will assess continuous and binary data. Assuming that two or more studies that are suitable for inclusion are found, and that the studies are considered to be homogenous, a meta-analysis will be performed on the results. The categories of outcome measure mentioned above differ conceptually in important ways, and have been used in a systematic different way across trials of the different intervention types identified above. Our review aims to make comparison across these different types of intervention study, thus we will standardize and ~~synthesize~~ ~~synthesise~~ the various categories of outcome measure using an inverse variance method in a

~~random effect model~~<sup>30</sup>. ~~The measures used for outcome are varied between studies and the standardized data will be heterogeneous. We will use a random effects model for the analyses~~<sup>30</sup>; ~~since we do not assume that each study is estimating exactly the same quantity.~~ We will compare the types of intervention model effectiveness for each outcome using a ~~standardized~~ standardised mean difference.

### Subgroup analysis and investigation of heterogeneity

We will undertake subgroup analyses and meta-regression ~~and where no significant heterogeneity of effect sizes is found.~~ ~~These~~ these will be pooled to calculate a final effect size. While these analyses may enable us to ~~hypothesize~~ hypothesise as to possible causes of differences between studies' findings, some heterogeneity is likely to remain, and any statistical analysis will be accompanied by a narrative synthesis.

Subgroup analysis will be undertaken if clinically different interventions are identified, or there are clinically relevant differences between participant groups.

Anticipated clinically relevant differences are:

1. intervention delivery type (e.g. therapist, parent-mediated, school-based) and length
2. intervention target skill (e.g. Theory of Mind as a whole, joint attention, emotion recognition, false belief understanding)
3. participant age (e.g. preschool, young children, ~~adolescents, adults~~), IQ (low versus normal or high), specific diagnosis and verbal ability.

Relevant subgroup analyses will also include:

- Severity of autism at baseline. ~~This is a crucial element in evaluating autism studies.~~
- Social economic status SES and other demographic variables.—
- ~~Sampling bias and external validity of studies is an important consideration.~~
- Age of child

·Type of intervention (our 3 groups as above)

·Parent-mediated (~~directing parents to train their children, not training the children directly~~) vs. child-mediated (~~training the children directly~~) intervention delivery

~~A key distinguishing point between different studies in the area.~~

·Cognitive ability at baseline

### Sensitivity analysis

Sensitivity analysis will be conducted to assess the impact of study quality on the results of the meta-analyses. For example, we will test to see if studies with high rates of loss to follow up or inadequate blinding are more likely to show positive outcomes and also to assess the impact of imputing missing data.

## DISCUSSION

~~This study will provide the most reliable basis for decisions on early intervention for preschool children with ASD. We believe that the findings of this systematic review and meta-analysis will have important implications for both clinical practice and research.~~

Meta-analysis of ~~randomized controlled trial~~RCTs ~~across types of intervention of the interventions~~ for preschool children with ASD ~~is an important step in providing a will~~ ~~can provide a more, the most~~ reliable basis for ~~the implementation~~ decisions of early ~~interventions for them.~~ ~~Since previous analyses have been essentially restricted to specific intervention types, and often with different outcome criteria, a study.~~ Analyses ~~as to across the~~ three representative models: behavioural, multimodal developmental or communication-focused models will guide future clinical practice and research trials for children with ASD. This study will provide information about which kind of intervention has ~~strength-strong~~ points and weak points, and what are those ~~strength~~

Formatted: Font: Times New Roman

1  
2  
3  
4  
5  
6  
7  
8 strong points and weak points are. This study may also suggest what kinds of elements  
9 future intervention programmes for children with ASD should have. This study may  
10 also reveal what points are lacking among the current intervention programmes for  
11 children with ASD. We strongly believe those findings will be able to translated into the  
12 clinical practices and patients and their family benefits. Anticipated challenges in  
13 synthesise the literature exist. The measures used for outcome are varied between  
14 studies and the standardised data will be heterogeneous. We do not assume that each  
15 study is estimating exactly the same quantity. Thus, we will use random effect models  
16 for the analyses<sup>30</sup>. In addition, the durations of the interventions will be different among  
17 the studies included in this study. We will synthesise the data regardless of the durations  
18 of the interventions, and will discuss the diversity of the durations in our paper.

Formatted: Font: Times New Roman

Formatted: Font: Times New Roman

Formatted: Do not check spelling or grammar, Superscript

Formatted: Font color: Auto

19  
20  
21  
22  
23  
24  
25  
26  
27  
28  
29  
30  
31  
32 **Authors' contribution** YT and JG contributed to draft the protocol and develop a  
33 search strategy. YT also drafted this manuscript. RE contributed to provide statistical  
34 advice for the design and the analysis. All authors read and approved the final  
35 manuscript.  
36

37  
38  
39 **Acknowledgement** We thank Claire Hodkinson for the peer-reviewing of this study's  
40 search strategy.  
41

42 **Competing interests** None.  
43

44 **Funding** This study was supported by JSPS titled 'Institutional Program for Young  
45 Researcher Overseas Visits'.  
46  
47

## 48 49 50 **References**

- 51 1. Baird G, Simonoff E, Pickles A, Chandler S, Loucas T, Meldrum D, et al. Prevalence  
52 of disorders of the autism spectrum in a population cohort of children in South  
53  
54

- 1  
2  
3  
4  
5  
6  
7  
8  
9 Thames: the Special Needs and Autism Project (SNAP). *The Lancet*  
10 2006;368(9531):210-15.  
11  
12 2. Newschaffer CJ, Croen LA, Daniels J, Giarelli E, Grether JK, Levy SE, et al. The  
13 epidemiology of autism spectrum disorders\*. *Annu. Rev. Public Health*  
14 2007;28:235-58.  
15  
16 3. Rogers SJ, Vismara LA. Evidence-based comprehensive treatments for early autism.  
17 *Journal of clinical child and adolescent psychology: the official journal for the*  
18 *Society of Clinical Child and Adolescent Psychology, American Psychological*  
19 *Association, Division 53* 2008;37(1):8.  
20  
21 4. Office USGA, Rights USCHCoGRSoH, Wellness. *Special education: children with*  
22 *autism: report to the Chairman and Ranking Minority Member, Subcommittee on*  
23 *Human Rights and Wellness, Committee on Government Reform, House of*  
24 *Representatives: DIANE Publishing, 2005.*  
25  
26 5. Smith T, Groen AD, Wynn JW. Randomized trial of intensive early intervention for  
27 children with pervasive developmental disorder. *American Journal on Mental*  
28 *Retardation* 2000;105(4):269-85.  
29  
30 6. Green J, Charman T, McConachie H, Aldred C, Slonims V, Howlin P, et al. Parent-  
31 mediated communication-focused treatment in children with autism (PACT): a  
32 randomised controlled trial. *The Lancet* 2010;375(9732):2152-60.  
33  
34 7. Dawson G, Rogers S, Munson J, Smith M, Winter J, Greenson J, et al. Randomized,  
35 controlled trial of an intervention for toddlers with autism: the Early Start  
36 Denver Model. *Pediatrics* 2010;125(1):e17.  
37  
38 8. Campbell MK, Elbourne DR, Altman DG. CONSORT statement: extension to cluster  
39 randomised trials. *Bmj* 2004;328(7441):702.  
40  
41 9. Eldevik S, Hastings RP, Hughes JC, Jahr E, Eikeseth S, Cross S. Meta-analysis of  
42 early intensive behavioral intervention for children with Autism. *Journal of*  
43  
44  
45  
46  
47  
48  
49  
50  
51  
52  
53  
54  
55  
56  
57  
58  
59  
60

- 1  
2  
3  
4  
5  
6  
7  
8  
9  
10  
11  
12  
13  
14  
15  
16  
17  
18  
19  
20  
21  
22  
23  
24  
25  
26  
27  
28  
29  
30  
31  
32  
33  
34  
35  
36  
37  
38  
39  
40  
41  
42  
43  
44  
45  
46  
47  
48  
49  
50  
51  
52  
53  
54  
55  
56  
57  
58  
59  
60
- Clinical Child and Adolescent Psychology* 2009;38(3):12.
10. Spreckley M, Boyd R. Efficacy of applied behavioral intervention in preschool children with autism for improving cognitive, language, and adaptive behavior: a systematic review and meta-analysis. *The Journal of pediatrics* 2009;154(3):338-44.
11. Makrygianni MK, Reed P. A meta-analytic review of the effectiveness of behavioural early intervention programs for children with autistic spectrum disorders. *Research in Autism Spectrum Disorders* 2010;4(4):577-93.
12. Smith T, Scahill L, Dawson G, Guthrie D, Lord C, Odom S, et al. Designing research studies on psychosocial interventions in autism. *Journal of autism and developmental Disorders* 2007;37(2):354-66.
13. Summerskill WSM. Hierarchy of evidence. *Key Topics in Evidence Based Medicine*. Oxford: Bios Scientific Publishers 2001.
14. Howlin P, Magiati I, Charman T. Systematic review of early intensive behavioral interventions for children with autism. *Journal Information* 2009;114(1).
15. Charman T. Commentary: Glass half full or half empty? Testing social communication interventions for young children with autism-reflections on Landa, Holman, O'Neill, and Stuart (2011). *Journal of Child Psychology and Psychiatry* 2011;52(1):22-23.
16. Association AP, DSM-IV. *Diagnostic and statistical manual of mental disorders: DSM-IV-TR*: American Psychiatric Publishing, Inc., 2000.
17. Organization WH. *The ICD-10 classification of mental and behavioural disorders: diagnostic criteria for research*: World Health Organization, 1993.
18. Lord C, Risi S, Lambrecht L, Cook EH, Leventhal BL, DiLavore PC, et al. The Autism Diagnostic Observation Schedule—Generic: A standard measure of social and communication deficits associated with the spectrum of autism.

- 1  
2  
3  
4  
5  
6  
7  
8  
9  
10  
11  
12  
13  
14  
15  
16  
17  
18  
19  
20  
21  
22  
23  
24  
25  
26  
27  
28  
29  
30  
31  
32  
33  
34  
35  
36  
37  
38  
39  
40  
41  
42  
43  
44  
45  
46  
47  
48  
49  
50  
51  
52  
53  
54  
55  
56  
57  
58  
59  
60
- Journal of autism and developmental Disorders* 2000;30(3):205-23.
19. Sparrow SS, Cicchetti DV. *The Vineland Adaptive Behavior Scales*: Allyn & Bacon, 1989.
20. Wechsler D. *Wechsler Preschool and Primary Scale of intelligence third edition*: San Antonio, TX: Harcourt Assessment, Inc, 2002.
21. Mundy P, Delgado C, Block J, Venezia M, Hogan A, Seibert J. Early Social Communication Scales (ESCS). *Coral Gables, FL: University of Miami* 2003.
22. Rogers SJ, Hepburn SL, Stackhouse T, Wehner E. Imitation performance in toddlers with autism and those with other developmental disorders. *Journal of Child Psychology and Psychiatry* 2003;44(5):763-81.
23. Wetherby AM, Prizant BM. *Communication and Symbolic Behavior Scales: Developmental Profile*: Paul H Brookes Publishing, 2002.
24. Aldred C, Green J, Adams C. A new social communication intervention for children with autism: pilot randomised controlled treatment study suggesting effectiveness. *Journal of Child Psychology and Psychiatry* 2004;45(8):1420-30.
25. Fenson L, Marchman VA, Thal D. *The MacArthur-Bates Communicative Development Inventories User's Guide and Technical Manual* 2006.
26. Moher D, Liberati A, Tetzlaff J, Altman DG. Preferred reporting items for systematic reviews and meta-analyses: the PRISMA statement. *PLoS Medicine* 2009;6(7):e1000097.
27. Higgins J, Green S. *Cochrane Handbook for Systematic Reviews of Interventions* Version 5.1. 0 [updated March 2011]. *The Cochrane Collaboration* 2011.
28. Deeks JJ, Altman DG, Bradburn MJ. *Statistical Methods for Examining Heterogeneity and Combining Results from Several Studies in Meta-Analysis. Systematic reviews in health care* 2001:285-312.
29. Higgins J, Thompson SG, Deeks JJ, Altman DG. Measuring inconsistency in meta-

1  
2  
3  
4  
5  
6  
7  
8  
9 analyses. *Bmj* 2003;327(7414):557.

- 10 30. Higgins DJPT, Green S. *Cochrane handbook for systematic reviews of interventions*:  
11  
12 Wiley Online Library, 2008.

13  
14  
15  
16  
17  
18  
19  
20  
21  
22  
23  
24  
25  
26  
27  
28  
29  
30  
31  
32  
33  
34  
35  
36  
37  
38  
39  
40  
41  
42  
43  
44  
45  
46  
47  
48  
49  
50  
51  
52  
53  
54  
55  
56  
57  
58  
59  
60

For peer review only
